# Supplementary material for: Copper(i)–Y zeolite catalyzed N-sulfonylketenimine mediated annulation of hydroxynaphthoquinones: syntheses of naphtho[2,1-b]furan-2,5-diones and benzo[de]chromene-2,6-diones
Source: Royal Society of Chemistry journal article supplement (doi:10.1039/c6cc03571j), 2016-01-01
Supplement: c6cc03571j1.pdf [file c6cc03571j1.pdf]

## Supporting Information

Devenderan Ramanathan,<sup>a</sup> Kayambu Namitharan,<sup>a</sup> Kasi Pitchumani<sup>\*a,b</sup>

<sup>a</sup> *School of Chemistry, Madurai Kamaraj University, Madurai – 625 021, India*

<sup>b</sup> *Centre for Green Chemistry Processes, School of Chemistry, Madurai Kamaraj University, Madurai – 625 021, India*

**E-mail :** pit12399@yahoo.com

### Contents

|    |                                                                                                                                  |    |
|----|----------------------------------------------------------------------------------------------------------------------------------|----|
| 1  | Experimental procedure                                                                                                           | 2  |
| 2  | Characterization of Cu(I)-Y zeolite                                                                                              | 3  |
| 3  | General procedure for the synthesis of naphtho[2,1- <i>b</i> ]furan-2,5-diones                                                   | 5  |
| 4  | General procedure for the synthesis of benzo[ <i>de</i> ]chromene-2,6-diones                                                     | 6  |
| 5  | Optimization in sulfonyl azides                                                                                                  | 7  |
| 6  | Reusability of Cu <sup>I</sup> Y zeolite                                                                                         | 7  |
| 7  | Absorbance and florescence values of naphtho[2,1- <i>b</i> ]furan-2,5-dione and benzo[ <i>de</i> ]chromene-2,6-dione derivatives | 8  |
| 8  | MTT-assay results                                                                                                                | 9  |
| 9  | Characterization                                                                                                                 | 13 |
| 10 | <sup>1</sup> H- and <sup>13</sup> C-NMR spectra and Mass analysis                                                                | 18 |
| 11 | References                                                                                                                       | 33 |

# 1. Experimental procedure

## General methods

All reactions were carried out under nitrogen atmosphere, with dry, freshly distilled solvents. All chemicals (2-hydroxy-1,4-naphthoquinone, 5-hydroxy-1,4-naphthoquinone, alkynes, sulfonyl chlorides, metal salts and  $\text{NH}_4\text{Y}$ ) were used as commercially available without further purification unless otherwise noted. NMR spectra were registered on Bruker DRX spectrometer operating at 300 & 400 MHz for  $^1\text{H}$  and 75 & 100 MHz for  $^{13}\text{C}$ . All  $^1\text{H}$  NMR and  $^{13}\text{C}$  NMR spectra were measured in  $\text{CDCl}_3$  with TMS as the internal standard. High resolution mass spectra were obtained by Orbitrap Elite. Purifications by column chromatography were performed on 60-120 mesh silica gel. The XRD pattern of the catalyst samples was measured with a PW3050/60 (XPRT-PRO Diffractometer system) instrument using a  $\text{Cu K}\alpha$  radiation at room temperature. Sulfonyl azides<sup>1</sup> were prepared according to the published methods.

## Preparation of $\text{Cu}^{\text{I}}$ -Y zeolite

$\text{Cu}^{\text{I}}$ -Y zeolite was prepared according to the reported procedure by Li et al.<sup>2</sup> A mixture of  $\text{CuCl}$  and HY (obtained from deammonification of  $\text{NH}_4\text{Y}$  at  $450^\circ\text{C}$  for 6h) was ground by pestle and mortar, it was heated in flowing nitrogen atmosphere at a heating rate of  $10^\circ\text{C}/\text{min}$ . The ion-exchange of  $\text{Cu}(\text{I})$  in solid  $\text{CuCl}$  with  $\text{H}^+$  in HY zeolite occurred at over  $300^\circ\text{C}$  and the maximum ion-exchange rate was reached at  $340^\circ\text{C}$  with the consequent release of  $\text{HCl}$  gas.  $\text{Cu}^{\text{I}}$ -Y was prepared at two different temperatures *via* heating the mixture of  $\text{CuCl}/\text{HY}$  at  $350^\circ\text{C}$  for 15 h and  $450^\circ\text{C}$  for 6 h under nitrogen atmosphere. After the preparation was over, the  $\text{Cu}^{\text{I}}$ -Y was kept under high vacuum. The prepared  $\text{Cu}^{\text{I}}$ -Y zeolite was characterized by powder XRD, and EDX which was found to be in good agreement with the literature.<sup>3</sup> The total copper content in the samples was determined by EDX analysis and it was found to be 13.09 wt% (Fig S2).

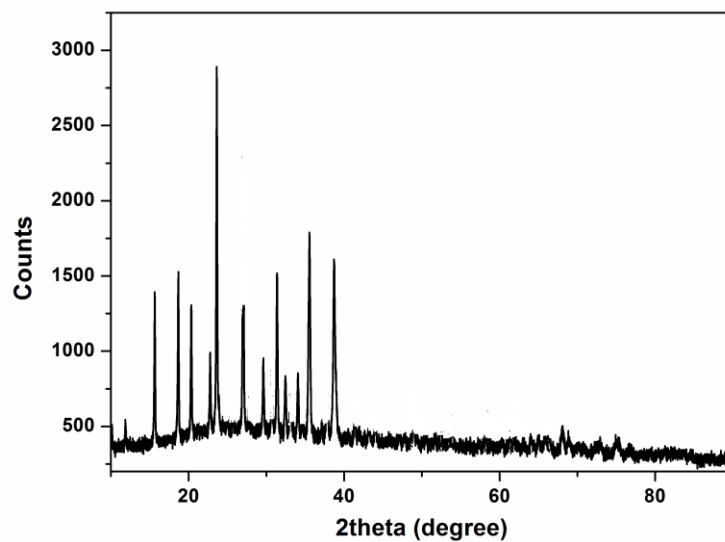

**Figure S1.** Powder XRD pattern of Cu<sup>I</sup> Y zeolite

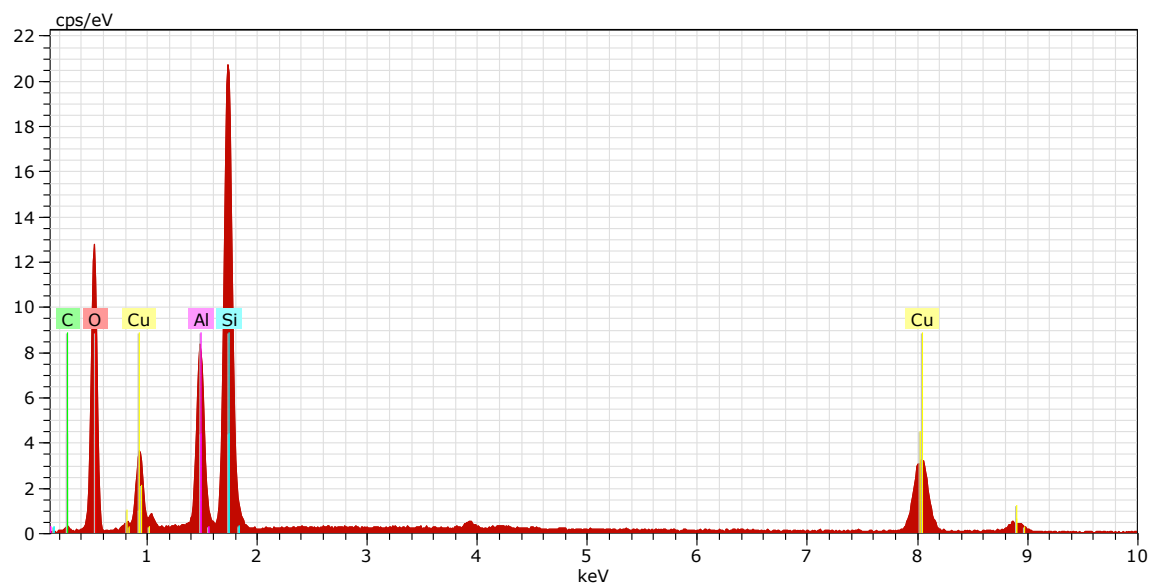

| Element   | AN | Series    | [wt.%]   | [norm. wt.%] | [norm. at.%] | Error in wt.% (1 Sigma) |
|-----------|----|-----------|----------|--------------|--------------|-------------------------|
| Oxygen    | 8  | K- Series | 54.47932 | 51.35877     | 65.27364     | 7.017194                |
| Silicon   | 14 | K- Series | 23.17572 | 21.84822     | 15.81834     | 1.066766                |
| Carbon    | 12 | K- Series | 4.961082 | 4.676914     | 7.917848     | 1.456259                |
| Aluminium | 13 | K- Series | 9.572342 | 9.024042     | 6.800821     | 0.5178                  |
| Copper    | 29 | K- Series | 13.88753 | 13.09205     | 4.189349     | 0.387437                |
| Sum:      |    |           | 106.076  | 100.00       | 100.00       |                         |

**Figure S2.** EDX spectrum of Cu<sup>I</sup> Y zeolite

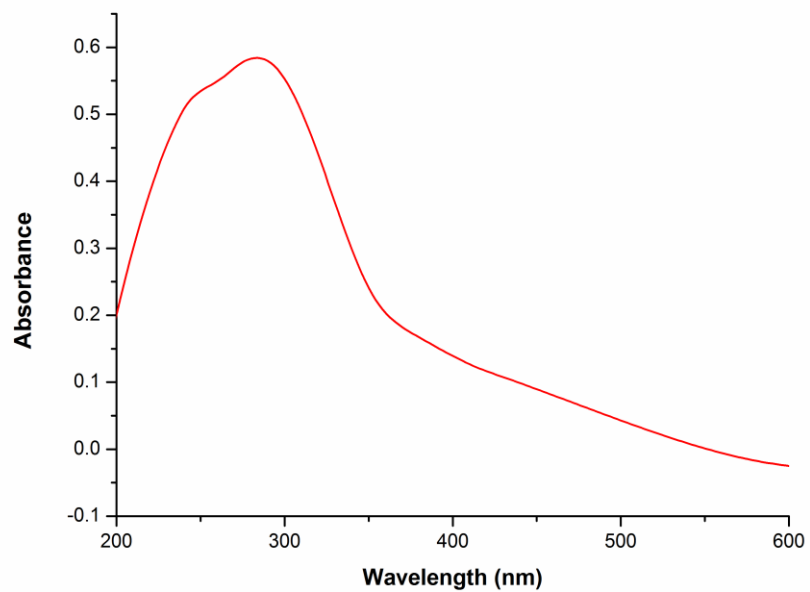

**Figure S3.** Ultra Violet- Diffuse Reflectance spectrum of Cu<sup>I</sup> Y zeolite

## General procedure for the synthesis of naphtho[2,1-*b*]furan-2,5-diones

A solution of alkyne (1.0 mmol) was added slowly to a mixture of Cu<sup>I</sup>Y- zeolite (10 mol%), sulfonyl azide (1.0 mmol), 2-hydroxy-1,4-naphthoquinone (1.0 mmol), triethylamine (2.0 mmol) and 4Å molecule sieves (100 mg) taken in 3 mL of 1,4-dioxane under nitrogen atmosphere at room temperature for the 30 minutes, after the completion of reaction the 1,4-dioxane was evaporated under reduced pressure then reaction mixture was diluted with ethyl acetate (5 mL). The catalyst was separated by filtration, followed by solvent evaporation under reduced pressure, the resulting crude product was finally purified by column chromatography by using silica gel (60-120 mesh), ethyl acetate and petroleum ether mixture (5%). The recovered catalyst was thoroughly washed with ethyl acetate and used it for next run.

The crystal structures of compound **4a** has been deposited at the Cambridge Crystallographic Data Centre and allocated the deposition number **CCDC 1465059**.

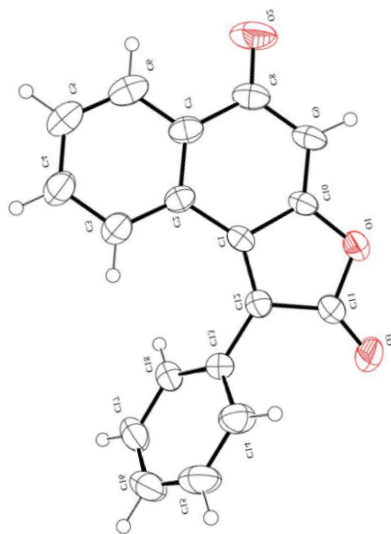

## General procedure for the synthesis of benzo[*de*]chromene-2,6-diones

A solution of alkyne (1.0 mmol) was added slowly to a mixture of Cu<sup>I</sup> Zeolite (10 mol %), sulfonyl azide (1.0 mmol), 5-hydroxy-1,4-naphthoquinone (1.0 mmol), triethylamine (2.0 mmol) and 4Å molecule sieves (100 mg) taken in 3 mL of 1,4-dioxane under nitrogen atmosphere at room temperature for the 1 h, after the completion of reaction the 1,4-dioxane was evaporated under reduced pressure then reaction mixture was diluted with ethyl acetate (5 mL). The catalyst was separated by filtration, followed by solvent evaporation under reduced pressure, the resulting crude product was finally purified by column chromatography by using silica gel (60-120 mesh), ethyl acetate and petroleum ether mixture (5%).

The crystal structures of compound **7d** has been deposited at the Cambridge Crystallographic Data Centre and allocated the deposition number **CCDC 1456377**.

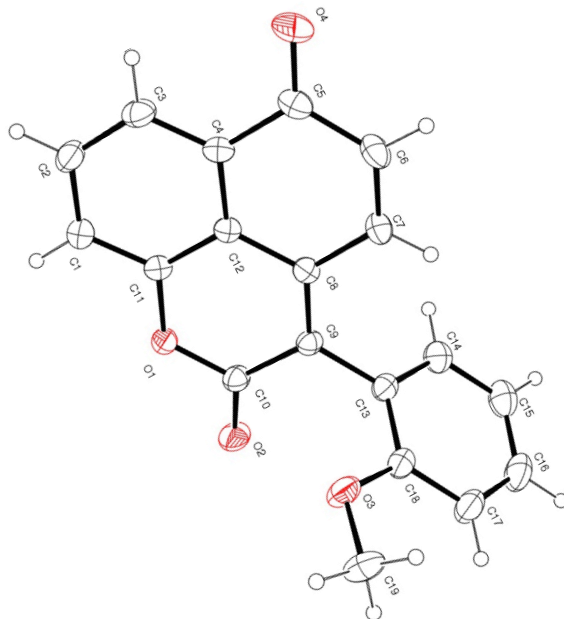

**Table 1. Optimization in sulfonyl azides. <sup>a</sup>**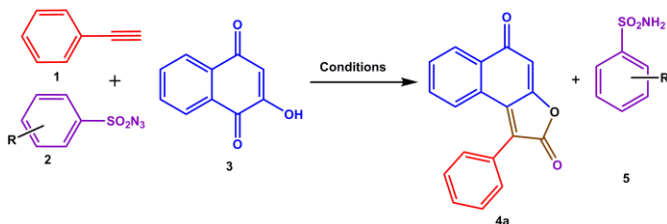

| Entry | R                                                      |    | Yield(%) <sup>b</sup> |
|-------|--------------------------------------------------------|----|-----------------------|
| 1     | 4-CH <sub>3</sub> -C <sub>6</sub> H <sub>4</sub> -     | 2a | 63                    |
| 2     | C <sub>6</sub> H <sub>5</sub> -                        | 2b | 56                    |
| 3     | 4-NO <sub>2</sub> -C <sub>6</sub> H <sub>4</sub> -     | 2c | 36                    |
| 4     | 2,4,5-Cl <sub>3</sub> -C <sub>6</sub> H <sub>2</sub> - | 2e | 52                    |
| 5     | 4-Br-C <sub>6</sub> H <sub>4</sub> -                   | 2d | 48                    |
| 6     | 2-Naphthyl-                                            | 2f | 31                    |

<sup>a</sup>Reaction conditions: Sulfonyl azide (1.0 mmol), phenylacetylene (1.0mmol), 2-hydroxy-1,4-naphthoquinone (1.0 mmol), Et<sub>3</sub>N (2.0 mmol), Cu<sup>I</sup>Y (10 mol%), molecular sieves (100mg), 1,4-dioxane (3.0 mL), rt, N<sub>2</sub>, 30 minutes. <sup>b</sup> Isolated yield.

**Table 2. Reusability of Cu<sup>I</sup> Y zeolite in the cascade synthesis of naphtho[2,1-*b*]furan-2,5-dione. <sup>a</sup>**

| Reuse              | 1st | 2nd | 3rd | 4th |
|--------------------|-----|-----|-----|-----|
| Yield <sup>b</sup> | 63  | 61  | 58  | 53  |

<sup>a</sup> Reaction conditions: Phenylacetylene (5.0 mmol, 0.6g), p-Toluenesulfonyl azide (5.0 mmol, 1.0 g), 2-hydroxy-1,4-naphthoquinone (5.0 mmol, 0.89 g), TEA (10 mmol, 1.35 mL), catalyst (10 mol %), 4Å molecular sieves (500 mg) solvent (10 ml), rt, 30 minutes. <sup>b</sup> Isolated yield.

**Table 3.** Absorbance and fluorescence values of naphtho[2,1-*b*]furan-2,5-dione and benzo[de]chromene-2,6-dione derivatives

| <b>S. No</b> | <b>Compound</b> | <b>Absorbance maximum (nm)</b> | <b>Excitation (nm)<br/>(<math>\lambda_{\text{excitation}}</math>)</b> | <b>Emission Maximum (nm)<br/>(<math>\lambda_{\text{emission}}</math>)</b> |
|--------------|-----------------|--------------------------------|-----------------------------------------------------------------------|---------------------------------------------------------------------------|
| 1.           | 4a              | 372                            | 380                                                                   | 454,558                                                                   |
| 2.           | 4b              | 380                            | 390                                                                   | 453,585                                                                   |
| 3.           | 4c              | 388                            | 400                                                                   | 507,590                                                                   |
| 4.           | 4d              | 390                            | 400                                                                   | 455,611                                                                   |
| 5.           | 4e              | 438                            | 450                                                                   | 578                                                                       |
| 6.           | 4f              | 440                            | 450                                                                   | 487,527,565                                                               |
| 7.           | 4g              | 420                            | 430                                                                   | 528,564,607                                                               |
| 8.           | 4h              | 548                            | 560                                                                   | -                                                                         |
| 9.           | 4i              | 372                            | 380                                                                   | 453,539                                                                   |
| 10.          | 7a              | 387                            | 400                                                                   | 546                                                                       |
| 11.          | 7b              | 389                            | 400                                                                   | 543                                                                       |
| 12.          | 7c              | 410                            | 420                                                                   | 543                                                                       |
| 13.          | 7d              | 390                            | 400                                                                   | 544                                                                       |
| 14.          | 7e              | 385                            | 400                                                                   | 543                                                                       |
| 15.          | 7f              | 383                            | 390                                                                   | 545                                                                       |



## MTT assay studies

Liver cancer cell line Hep3B and breast cancer cell line MB231 were maintained in MEM and DMEM-Highglucose media respectively along with 10 % fetal bovine serum and other supplements (Himedia). MTT assay was performed as described earlier (Denizot and Lang, 1986).<sup>4</sup> About 8000 cells were seeded per well in 96 well cell culture dishes. After 24hrs of incubation, cells were treated with seven different concentrations of drugs with DMSO as a vehicle control and further incubated for 36 hrs. Subsequently, MTT (3-(4,5-Dimethylthiazol-2-yl)-2,5-Diphenyltetrazolium Bromide) (Himedia, India) was added to the cells and incubated for 4hrs. The formed formazon was dissolved in DMSO and readings were taken calorimetrically at 570nm and 630nm. Optical density values were calculated as percentage of cell viability in comparison to the control cells.

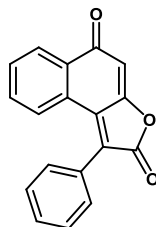

4a

### HEP3B-Liver Cell Line

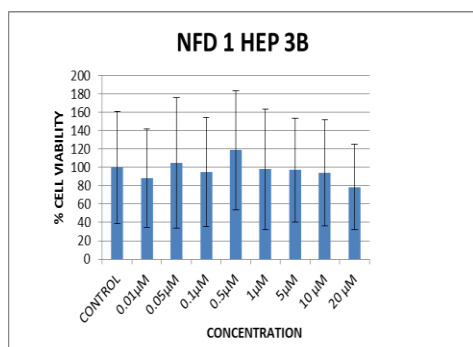

### B-231- Breast Cell line

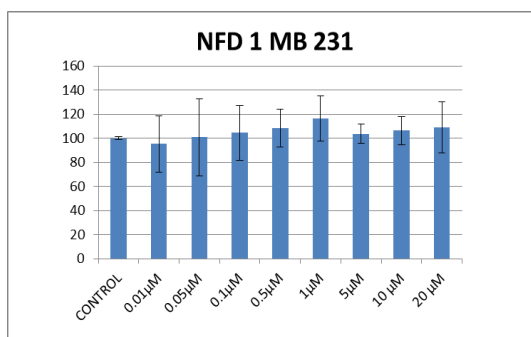

### AGS-Gastric Cell line

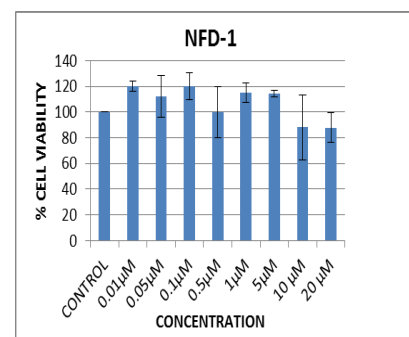

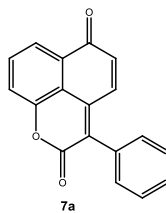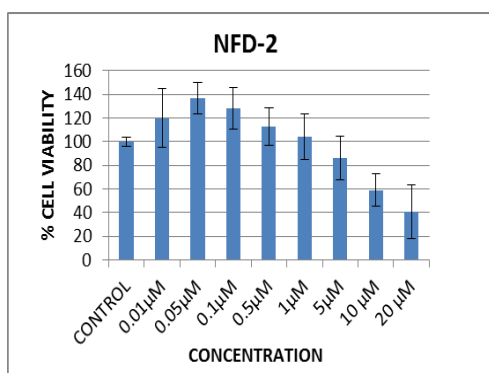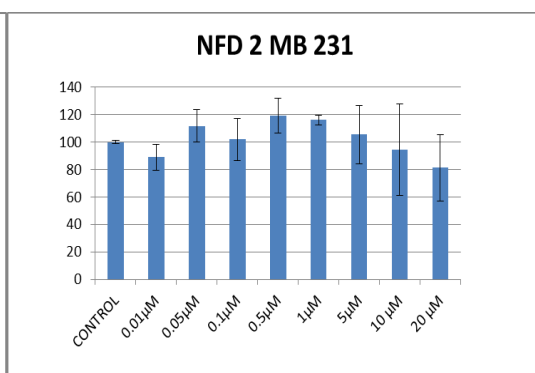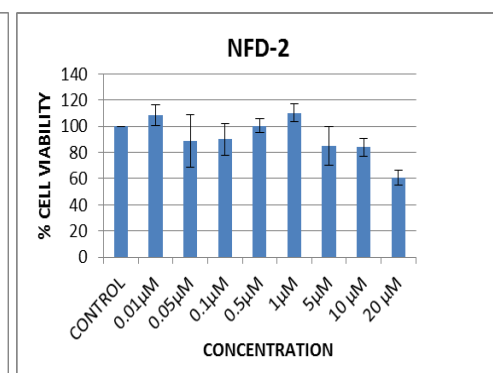

**Hep3B Cell line**

**MB231 Cell Line**

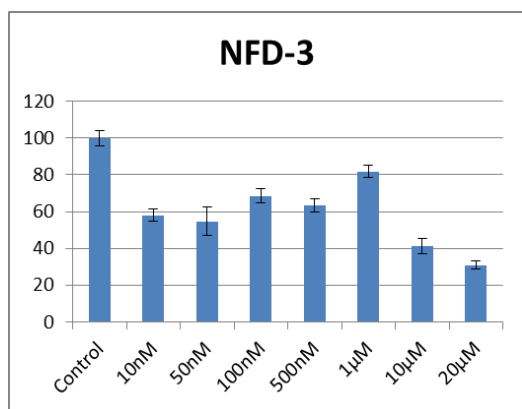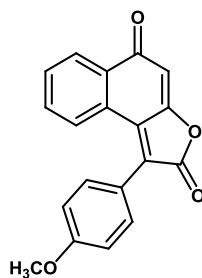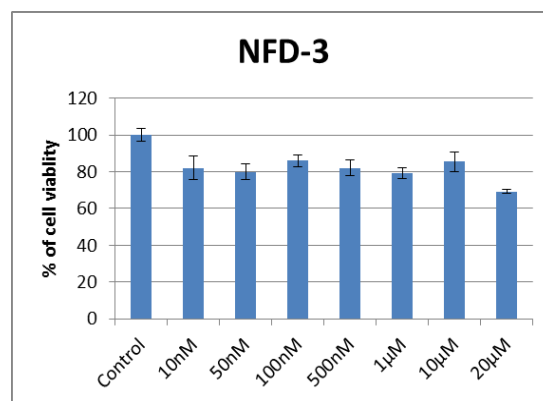

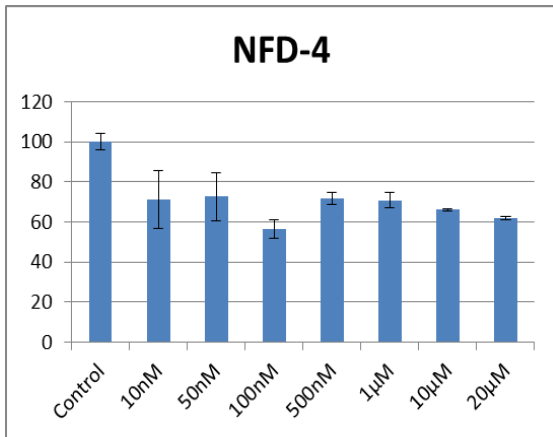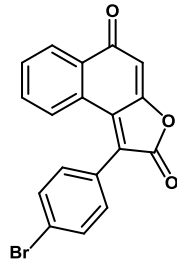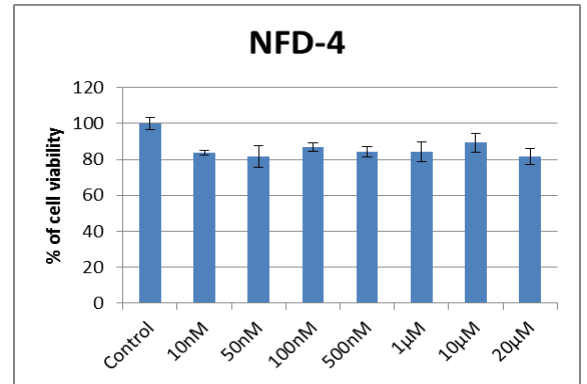

### Hep3B Cell line

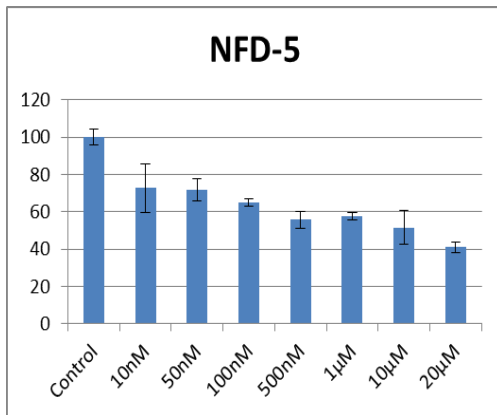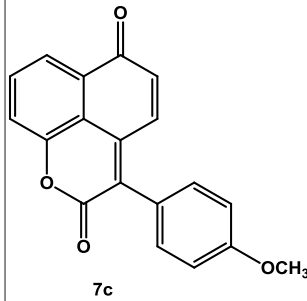

### MB231 Cell Line

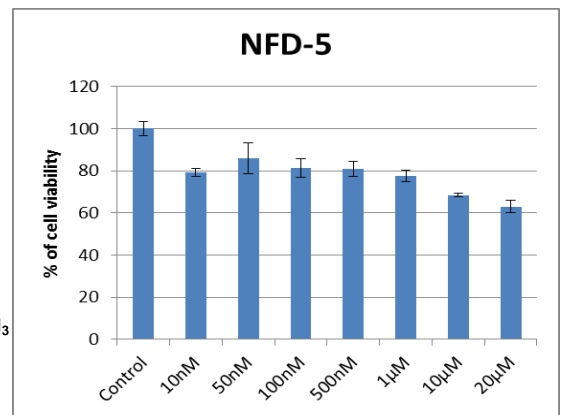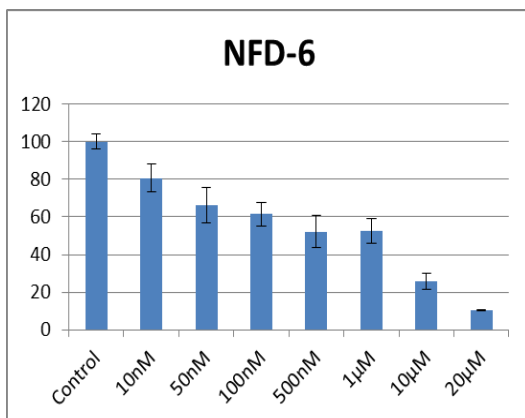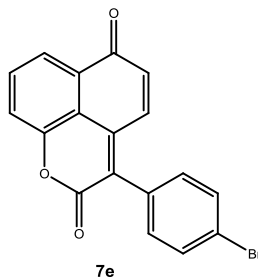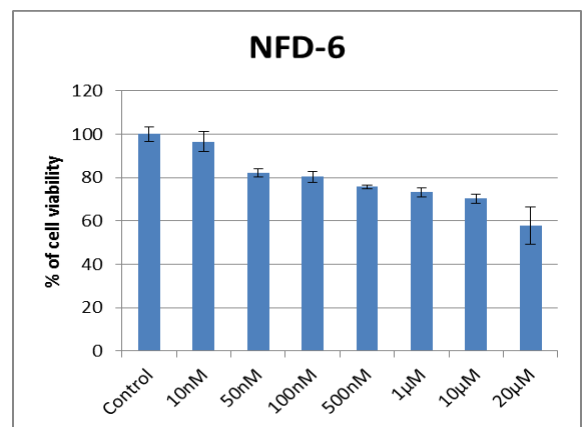

**Table 4. Cell viability results**

| <b>Compound code</b>      | <b>Hep3B at 10 <math>\mu</math>M</b> | <b>MB 231 at 10 <math>\mu</math>M</b> | <b>AGS at 10 <math>\mu</math>M</b> |
|---------------------------|--------------------------------------|---------------------------------------|------------------------------------|
| <b>Cell Viability (%)</b> |                                      |                                       |                                    |
| <b>4a</b>                 | 94                                   | 104                                   | 88                                 |
| <b>4f</b>                 | 41                                   | 85                                    |                                    |
| <b>4i</b>                 | 66                                   | 89                                    |                                    |
| <b>7a</b>                 | 59                                   | 94                                    | 84                                 |
| <b>7c</b>                 | 52                                   | 68                                    |                                    |
| <b>7e</b>                 | 26                                   | 70                                    |                                    |

## Characterization Data

|                                                                                                                                  |                                                                                                                                                                                                                                                                                                                                                                                                                                                                                                                                                                                                                                                                                                                                                             |
|----------------------------------------------------------------------------------------------------------------------------------|-------------------------------------------------------------------------------------------------------------------------------------------------------------------------------------------------------------------------------------------------------------------------------------------------------------------------------------------------------------------------------------------------------------------------------------------------------------------------------------------------------------------------------------------------------------------------------------------------------------------------------------------------------------------------------------------------------------------------------------------------------------|
| 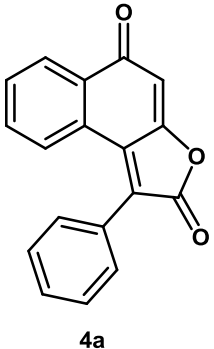 <p style="text-align: center;"><b>4a</b></p>   | <p><b>1-Phenylnaphtho[2,1-<i>b</i>]furan-2,5-dione (Table 2, 4a):</b> Compound is prepared according to the general procedure, M.p-174 °C, Yield (63%). <sup>1</sup>H- NMR (400 MHz, CDCl<sub>3</sub>) δ 8.25 (d, <i>J</i> = 9.1 Hz, 1H), 7.86 (d, <i>J</i> = 7.9 Hz, 1H), 7.63 – 7.61 (m, 2H), 7.59 – 7.57 (m, 4H), 7.45 (t, <i>J</i> = 7.7 Hz, 1H), 6.38 (s, 1H). <sup>13</sup>C NMR (75 MHz, CDCl<sub>3</sub>) δ 184.02, 167.15, 161.03, 138.27, 132.56, 131.88, 131.07, 130.66, 129.45, 129.23, 129.13, 128.81, 127.89, 127.65, 126.22, 106.47. HRMS (ESI) <i>m/z</i>: [M+H]<sup>+</sup> calcd. for [C<sub>18</sub>H<sub>11</sub>O<sub>3</sub>]<sup>+</sup>: 275.0703, found: 275.0701.</p>                                                             |
|  <p style="text-align: center;"><b>4b</b></p>  | <p><b>1-<i>p</i>-Tolynaphtho[2,1-<i>b</i>]furan-2,5-dione (Table 2, 4b):</b> Compound is prepared according to the general procedure, M.p-195 °C, Yield (67%). <sup>1</sup>H-NMR (300 MHz, CDCl<sub>3</sub>) δ 8.24 (d, <i>J</i> = 9.0 Hz, 1H), 7.93 (d, <i>J</i> = 8.6 Hz, 1H), 7.57 (d, <i>J</i> = 6.6 Hz, 1H), 7.52 (d, <i>J</i> = 8.2 Hz, 2H), 7.48 – 7.43 (m, 1H), 7.37 (d, <i>J</i> = 7.9 Hz, 2H), 6.35 (s, 1H), 2.48 (s, 3H). <sup>13</sup>C-NMR (75 MHz, DMSO) δ 184.20, 167.37, 161.15, 141.25, 137.61, 132.54, 131.76, 131.00, 129.85, 129.62, 129.43, 127.84, 127.79, 126.14, 125.75, 106.34, 21.60. HRMS (ESI) <i>m/z</i>: [M+H]<sup>+</sup> calcd. for [C<sub>19</sub>H<sub>13</sub>O<sub>3</sub>]<sup>+</sup>: 289.0859, found: 289.0860.</p> |
|  <p style="text-align: center;"><b>4c</b></p> | <p><b>1-<i>m</i>-Tolynaphtho[2,1-<i>b</i>]furan-2,5-dione (Table 2, 4c):</b> Compound is prepared according to the general procedure, M.p-164 °C, Yield (60%). <sup>1</sup>H-NMR (300 MHz, CDCl<sub>3</sub>) δ 8.25 (d, <i>J</i> = 7.9 Hz, 1H), 7.87 (d, <i>J</i> = 7.9 Hz, 1H), 7.63 – 7.55 (m, 2H), 7.47 – 7.44 (m, 2H), 7.41 (s, 2H), 6.36 (s, 1H), 2.45 (s, 3H). <sup>13</sup>C-NMR (75 MHz, CDCl<sub>3</sub>) δ 183.74, 166.70, 160.62, 138.36, 132.55, 132.43, 132.33, 132.00, 130.90, 130.80, 127.91, 127.86, 127.42, 127.20, 125.94, 125.18, 106.56, 21.35. HRMS (ESI) <i>m/z</i>: [M+H]<sup>+</sup> calcd. for [C<sub>19</sub>H<sub>13</sub>O<sub>3</sub>]<sup>+</sup>: 289.0859, found: 289.0791.</p>                                             |

|                                                                                                                                  |                                                                                                                                                                                                                                                                                                                                                                                                                                                                                                                                                                                                                                                                                                                                                                                                                                                                                                                  |
|----------------------------------------------------------------------------------------------------------------------------------|------------------------------------------------------------------------------------------------------------------------------------------------------------------------------------------------------------------------------------------------------------------------------------------------------------------------------------------------------------------------------------------------------------------------------------------------------------------------------------------------------------------------------------------------------------------------------------------------------------------------------------------------------------------------------------------------------------------------------------------------------------------------------------------------------------------------------------------------------------------------------------------------------------------|
| 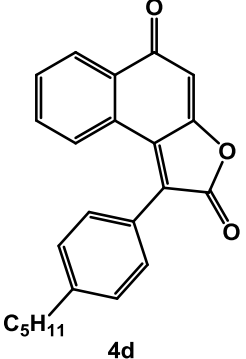 <p style="text-align: center;"><b>4d</b></p>   | <p><b>1-(4-Pentylphenyl)naphtho[2,1-<i>b</i>]furan-2,5-dione (Table 2, 4d):</b> Compound is prepared according to the general procedure, M.p-188 °C, Yield (65%). <sup>1</sup>H-NMR (400 MHz, CDCl<sub>3</sub>) δ 8.25 (d, <i>J</i> = 7.8 Hz, 1H), 7.95 (s, 1H), 7.62 – 7.50 (m, 3H), 7.46 (t, <i>J</i> = 7.7 Hz, 1H), 7.37 (d, <i>J</i> = 8.0 Hz, 2H), 6.36 (s, 1H), 2.76 – 2.67 (m, 2H), 1.77 – 1.66 (m, 2H), 1.38 (dd, <i>J</i> = 8.8, 5.2 Hz, 4H), 0.93 (t, <i>J</i> = 6.9 Hz, 3H). <sup>13</sup>C-NMR (75 MHz, CDCl<sub>3</sub>) δ 184.04, 167.39, 161.16, 146.26, 132.92, 132.55, 131.75, 130.97, 129.45, 129.33, 129.24, 129.15, 127.83, 126.14, 125.88, 106.33, 35.96, 31.52, 30.80, 22.49, 13.99. HRMS (ESI) <i>m/z</i>: [M+H]<sup>+</sup> calcd. for [C<sub>23</sub>H<sub>21</sub>O<sub>3</sub>]<sup>+</sup>:345.1485,found: 345.1483.</p>                                                             |
|  <p style="text-align: center;"><b>4e</b></p>  | <p><b>1-(6-Methoxynaphthalen-2-enyl)naphtho[2,1-<i>b</i>]furan-2,5-dione (Table 2, 4e):</b> Compound is prepared according to the general procedure, M.p-204 °C, Yield (73%). <sup>1</sup>H-NMR (300 MHz, CDCl<sub>3</sub>) δ 8.25 (d, <i>J</i> = 7.8 Hz, 1H), 8.09 (s, 1H), 7.94 (d, <i>J</i> = 7.9 Hz, 1H), 7.88 (d, <i>J</i> = 8.5 Hz, 1H), 7.81 (d, <i>J</i> = 8.7 Hz, 1H), 7.62 (d, <i>J</i> = 10.3 Hz, 1H), 7.56 (d, <i>J</i> = 7.6 Hz, 1H), 7.41 (t, <i>J</i> = 8.3 Hz, 1H), 7.21 (s, 2H), 6.36 (s, 1H), 3.97 (s, 3H). <sup>13</sup>C-NMR (75 MHz, CDCl<sub>3</sub>) δ 184.22, 167.40, 161.17, 159.37, 137.43, 135.59, 132.53, 131.75, 130.98, 130.29, 130.03, 129.52, 128.46, 127.85, 127.79, 127.59, 126.43, 126.08, 123.57, 119.94, 106.29, 105.89, 55.44. HRMS (ESI) <i>m/z</i>: [M+H]<sup>+</sup> calcd. for [C<sub>23</sub>H<sub>15</sub>O<sub>4</sub>]<sup>+</sup>: 355.0965, found: 355.0952.</p> |
|  <p style="text-align: center;"><b>4f</b></p> | <p><b>1-(4-Methoxyphenyl)naphtho[2,1-<i>b</i>]furan-2,5-dione (Table 2, 4f):</b> Compound is prepared according to the general procedure, M.p-170 °C, Yield (71%). <sup>1</sup>H-NMR (400 MHz, CDCl<sub>3</sub>) δ 8.26 (d, <i>J</i> = 7.6 Hz, 1H), 7.99 (d, <i>J</i> = 7.6 Hz, 1H), 7.63 (d, <i>J</i> = 8.8 Hz, 2H), 7.58 (d, <i>J</i> = 6.8 Hz, 1H), 7.47 (t, <i>J</i> = 7.0 Hz, 1H), 7.07 (d, <i>J</i> = 9.2 Hz, 2H), 6.35 (s, 1H), 3.92 (s, 3H). <sup>13</sup>C-NMR (75 MHz, CDCl<sub>3</sub>) δ 184.07, 167.38, 161.20, 136.65, 133.51, 132.43, 131.55, 131.31, 129.26, 127.79, 125.88, 120.77, 114.62, 106.07, 55.43. HRMS (ESI) <i>m/z</i>: [M+H]<sup>+</sup> calcd. for [C<sub>19</sub>H<sub>13</sub>O<sub>4</sub>]<sup>+</sup>: 305.0808, found: 305.0807.</p>                                                                                                                                          |

|                                                                                                                                  |                                                                                                                                                                                                                                                                                                                                                                                                                                                                                                                                                                                                                                                                                                                                                                                                  |
|----------------------------------------------------------------------------------------------------------------------------------|--------------------------------------------------------------------------------------------------------------------------------------------------------------------------------------------------------------------------------------------------------------------------------------------------------------------------------------------------------------------------------------------------------------------------------------------------------------------------------------------------------------------------------------------------------------------------------------------------------------------------------------------------------------------------------------------------------------------------------------------------------------------------------------------------|
| 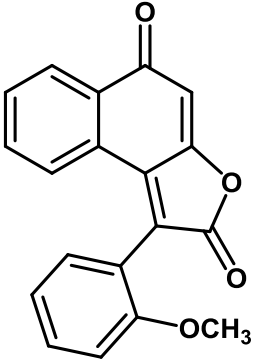 <p style="text-align: center;"><b>4g</b></p>   | <p><b>1-(2-Methoxyphenyl)naphtho[2,1-<i>b</i>]furan-2,5-dione (Table 2, 4g):</b> Compound is prepared according to the general procedure, M.p-166 °C, Yield (59%). <sup>1</sup>H-NMR (400 MHz, CDCl<sub>3</sub>) δ 8.23 (d, <i>J</i> = 7.8 Hz, 1H), 7.54 (d, <i>J</i> = 6.2 Hz, 2H), 7.50 (d, <i>J</i> = 7.9 Hz, 1H), 7.43 (d, <i>J</i> = 7.6 Hz, 2H), 7.14 (d, <i>J</i> = 7.5 Hz, 1H), 7.08 (d, <i>J</i> = 8.4 Hz, 1H), 6.35 (s, 1H), 3.76 (s, 3H). <sup>13</sup>C-NMR (75 MHz, CDCl<sub>3</sub>) δ 184.47, 161.33, 157.35, 139.43, 134.36, 132.41, 132.17, 131.52, 130.84, 127.45, 126.87, 121.10, 111.57, 106.21, 55.53. HRMS (ESI) <i>m/z</i>: [M+H]<sup>+</sup> calcd. for [C<sub>19</sub>H<sub>13</sub>O<sub>4</sub>]<sup>+</sup>: 305.0808, found: 305.0838.</p>                          |
|  <p style="text-align: center;"><b>4h</b></p>  | <p><b>1-(4-(Dimethylamino)phenyl)naphtho[2,1-<i>b</i>]furan-2,5-dione (Table 2, 4h):</b> Compound is prepared according to the general procedure, M.p-215 °C, Yield (56%). <sup>1</sup>H-NMR (400 MHz, CDCl<sub>3</sub>) δ 8.25 (d, <i>J</i> = 8.9 Hz, 1H), 8.20 (d, <i>J</i> = 7.8 Hz, 1H), 7.64 (d, <i>J</i> = 9.0 Hz, 2H), 7.54 (d, <i>J</i> = 7.7 Hz, 1H), 7.48 (d, <i>J</i> = 8.9 Hz, 1H), 6.80 (d, <i>J</i> = 9.0 Hz, 2H), 6.31 (s, 1H), 3.11 (s, 6H). <sup>13</sup>C-NMR (75 MHz, CDCl<sub>3</sub>) δ 184.37, 167.80, 161.65, 151.85, 133.20, 132.19, 131.40, 130.91, 130.79, 129.81, 128.50, 127.60, 125.47, 115.52, 111.57, 105.27, 40.01. HRMS (ESI) <i>m/z</i>: [M+H]<sup>+</sup> calcd. for [C<sub>20</sub>H<sub>16</sub>NO<sub>3</sub>]<sup>+</sup>: 318.1125, found: 318.1124.</p> |
|  <p style="text-align: center;"><b>4i</b></p> | <p><b>1-(4-Bromophenyl)naphtho[2,1-<i>b</i>]furan-2,5-dione (Table 2, 4i):</b>Compound is prepared according to the general procedure, M.p-182 °C, Yield (52%). <sup>1</sup>H-NMR (300 MHz, CDCl<sub>3</sub>) δ 8.22 (s, 1H), 7.83 (d, <i>J</i> = 7.8 Hz, 1H), 7.72 (d, <i>J</i> = 7.4 Hz, 2H), 7.61 (t, <i>J</i> = 7.5 Hz, 1H), 7.57-7.43 (m, 3H), 6.35 (s, 1H). <sup>13</sup>C-NMR (75 MHz, CDCl<sub>3</sub>) δ 183.90, 166.85, 160.77, 138.51, 132.71, 132.58, 132.48, 132.15, 131.06, 130.95, 128.06, 128.02, 127.57, 127.35, 126.10, 125.34, 106.71. HRMS (ESI) <i>m/z</i>: [M+H]<sup>+</sup> calcd. for [C<sub>18</sub>H<sub>10</sub>BrO<sub>3</sub>]<sup>+</sup>: 352.9808, found: 352.9806.</p>                                                                                          |

|                                                                                                                                  |                                                                                                                                                                                                                                                                                                                                                                                                                                                                                                                                                                                                                                                                                                                                                 |
|----------------------------------------------------------------------------------------------------------------------------------|-------------------------------------------------------------------------------------------------------------------------------------------------------------------------------------------------------------------------------------------------------------------------------------------------------------------------------------------------------------------------------------------------------------------------------------------------------------------------------------------------------------------------------------------------------------------------------------------------------------------------------------------------------------------------------------------------------------------------------------------------|
| 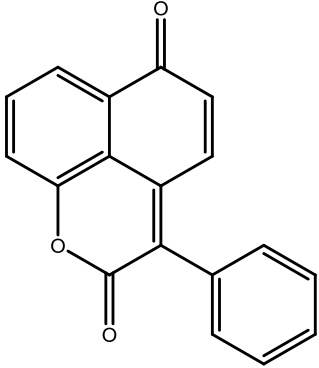 <p style="text-align: center;"><b>7a</b></p>   | <p><b>3-Phenylbenzo[de]chromene-2,6-dione (Table 3, 7a):</b> Compound is prepared according to the general procedure, M.p-208 °C, Yield (68%). <sup>1</sup>H-NMR (400 MHz, CDCl<sub>3</sub>) δ 8.12 (d, <i>J</i> = 8.8 Hz, 1H), 7.75 (t, <i>J</i> = 8.0 Hz, 1H), 7.63 (d, <i>J</i> = 9.6 Hz, 1H), 7.55 – 7.49 (m, 4H), 7.44 – 7.47 (m, 2H), 6.73 (d, <i>J</i> = 10.0 Hz, 1H). <sup>13</sup>C-NMR (101 MHz, CDCl<sub>3</sub>) δ 183.35, 160.25, 151.19, 136.31, 135.68, 134.07, 131.82, 131.48, 131.38, 130.95, 129.76, 129.05, 128.48, 123.40, 120.74, 117.09. HRMS (ESI) <i>m/z</i>: [M+H]<sup>+</sup> calcd. for [C<sub>18</sub>H<sub>11</sub>O<sub>3</sub>]<sup>+</sup>: 275.0703, found: 275.0693.</p>                                      |
|  <p style="text-align: center;"><b>7b</b></p>  | <p><b>3-p-Tolylbenzo[de]chromene-2,6-dione (Table 3, 7b):</b> Compound is prepared according to the general procedure, M.p-223 °C, Yield (66%). <sup>1</sup>H-NMR (300 MHz, CDCl<sub>3</sub>) δ 8.12 (d, <i>J</i> = 7.4 Hz, 1H), 7.75 (d, <i>J</i> = 7.8 Hz, 1H), 7.63 (d, <i>J</i> = 8.1 Hz, 1H), 7.55 (d, <i>J</i> = 10.2 Hz, 1H), 7.36 (s, 4H), 6.72 (d, <i>J</i> = 10.2 Hz, 1H), 2.45 (s, 3H). <sup>13</sup>C-NMR (75 MHz, CDCl<sub>3</sub>) δ 183.26, 160.22, 151.11, 140.03, 136.41, 135.27, 133.78, 131.94, 131.24, 130.94, 129.15, 129.02, 128.49, 123.22, 120.55, 117.16, 21.34. HRMS (ESI) <i>m/z</i>: [M + Na]<sup>+</sup> calcd. for [C<sub>19</sub>H<sub>12</sub>O<sub>3</sub>Na]<sup>+</sup>: 311.0679, found: 311.0675.</p>      |
|  <p style="text-align: center;"><b>7c</b></p> | <p><b>3-(4-Methoxyphenyl)benzo[de]chromene-2,6-dione (Table 3, 7c):</b> Compound is prepared according to the general procedure, M.p-213 °C, Yield (72%). <sup>1</sup>H-NMR (300 MHz, CDCl<sub>3</sub>) δ 8.12 (d, <i>J</i> = 7.6 Hz, 1H), 7.74 (t, <i>J</i> = 7.9 Hz, 1H), 7.63-7.56 (m, 2H), 7.44 (d, <i>J</i> = 8.7 Hz, 2H), 7.06 (d, <i>J</i> = 8.7 Hz, 2H), 6.74 (d, <i>J</i> = 10.2 Hz, 1H), 3.90 (s, 3H). <sup>13</sup>C-NMR (75 MHz, CDCl<sub>3</sub>) δ 183.41, 161.02, 151.10, 136.59, 134.95, 133.74, 132.78, 131.65, 131.18, 129.11, 123.69, 123.32, 120.57, 117.37, 114.07, 55.45. HRMS (ESI) <i>m/z</i>: [M+ Na]<sup>+</sup> calcd. for [C<sub>19</sub>H<sub>12</sub>O<sub>4</sub>Na]<sup>+</sup>: 327.0628, found: 327.0622.</p> |



|                                                                                                                                  |                                                                                                                                                                                                                                                                                                                                                                                                                                                                                                                                                                                                                                                                                                                                                                                                                                                         |
|----------------------------------------------------------------------------------------------------------------------------------|---------------------------------------------------------------------------------------------------------------------------------------------------------------------------------------------------------------------------------------------------------------------------------------------------------------------------------------------------------------------------------------------------------------------------------------------------------------------------------------------------------------------------------------------------------------------------------------------------------------------------------------------------------------------------------------------------------------------------------------------------------------------------------------------------------------------------------------------------------|
| 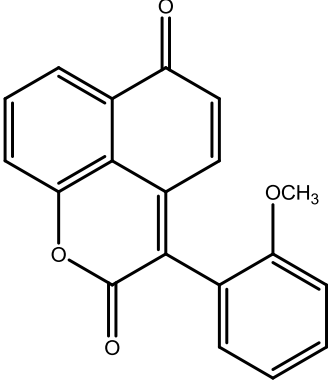 <p style="text-align: center;"><b>7d</b></p>   | <p><b>3-(2-Methoxyphenyl)benzo[de]chromene-2,6-dione (Table 3, 7d):</b><br/> Compound is prepared according to the general procedure, M.p-215 °C, Yield (70%). <sup>1</sup>H-NMR (300 MHz, CDCl<sub>3</sub>) δ 8.10 (d, <i>J</i> = 7.6 Hz, 1H), 7.73 (t, <i>J</i> = 7.9 Hz, 1H), 7.63 (d, <i>J</i> = 8.2 Hz, 1H), 7.50 (t, <i>J</i> = 7.9 Hz, 1H), 7.36 (d, <i>J</i> = 10.2 Hz, 1H), 7.26 (d, <i>J</i> = 7.2 Hz, 1H), 7.12 (d, <i>J</i> = 7.5 Hz, 1H), 7.06 (d, <i>J</i> = 8.5 Hz, 1H), 6.69 (d, <i>J</i> = 10.2 Hz, 1H), 3.81 (s, 3H). <sup>13</sup>C-NMR (75 MHz, CDCl<sub>3</sub>) δ 183.56, 159.59, 151.31, 146.20, 136.53, 133.67, 131.62, 131.32, 129.73, 128.93, 123.11, 120.68, 120.59, 116.81, 55.68. HRMS (ESI) m/z: [M+ Na]<sup>+</sup> calcd. for [C<sub>19</sub>H<sub>12</sub>O<sub>4</sub>Na]<sup>+</sup>: 327.0628, found: 327.0583.</p> |
|  <p style="text-align: center;"><b>7e</b></p>  | <p><b>3-(4-Bromophenyl)benzo[de]chromene-2,6-dione (Table 3, 7e):</b><br/> Compound is prepared according to the general procedure, M.p-210 °C, Yield (60%). <sup>1</sup>H-NMR (300 MHz, CDCl<sub>3</sub>) δ 8.14 (d, <i>J</i> = 7.5 Hz, 1H), 7.78 (t, <i>J</i> = 7.9 Hz, 2H), 7.67 (s, 2H), 7.49 (d, <i>J</i> = 10.1 Hz, 1H), 7.33 (s, 2H), 6.76 (d, <i>J</i> = 10.2 Hz, 1H). <sup>13</sup>C-NMR (101 MHz, CDCl<sub>3</sub>) δ 183.22, 159.99, 151.20, 135.96, 135.79, 134.47, 132.56, 131.84, 131.76, 130.48, 130.26, 129.03, 124.50, 123.58, 120.88, 116.94. HRMS (ESI) m/z: [M + Na]<sup>+</sup> calcd. for [C<sub>18</sub>H<sub>9</sub>BrNaO<sub>3</sub>]<sup>+</sup>: 374.9627, found: 374.9632.</p>                                                                                                                                              |
|  <p style="text-align: center;"><b>7g</b></p> | <p><b>3-Cyclopropylbenzo[de]chromene-2,6-dione (table 3, 7f):</b><br/> Compound is prepared according to the general procedure, M.p-198 °C Yield (59%). <sup>1</sup>H-NMR (400 MHz, CDCl<sub>3</sub>) δ 8.15 (d, <i>J</i> = 10.3 Hz, 1H), 8.06 (d, <i>J</i> = 7.2 Hz, 1H), 7.65 (t, <i>J</i> = 7.9 Hz, 1H), 7.53 (d, <i>J</i> = 7.6 Hz, 1H), 6.80 (d, <i>J</i> = 10.3 Hz, 1H), 2.11 – 2.01 (m, 1H), 1.32 (t, <i>J</i> = 5.7 Hz, 2H), 1.23 – 1.15 (m, 2H). <sup>13</sup>C-NMR (101 MHz, CDCl<sub>3</sub>) δ 183.53, 159.61, 150.59, 136.40, 134.43, 133.83, 133.47, 130.61, 128.50, 123.06, 120.45, 117.02, 11.07, 8.61. HRMS (ESI): m/z [M + H]<sup>+</sup> calculated for [C<sub>15</sub>H<sub>11</sub>O<sub>3</sub>]<sup>+</sup>: 239.0703, found: 239.0704.</p>                                                                                      |

# $^1\text{H}$ and $^{13}\text{C}$ -NMR spectra and Mass analysis

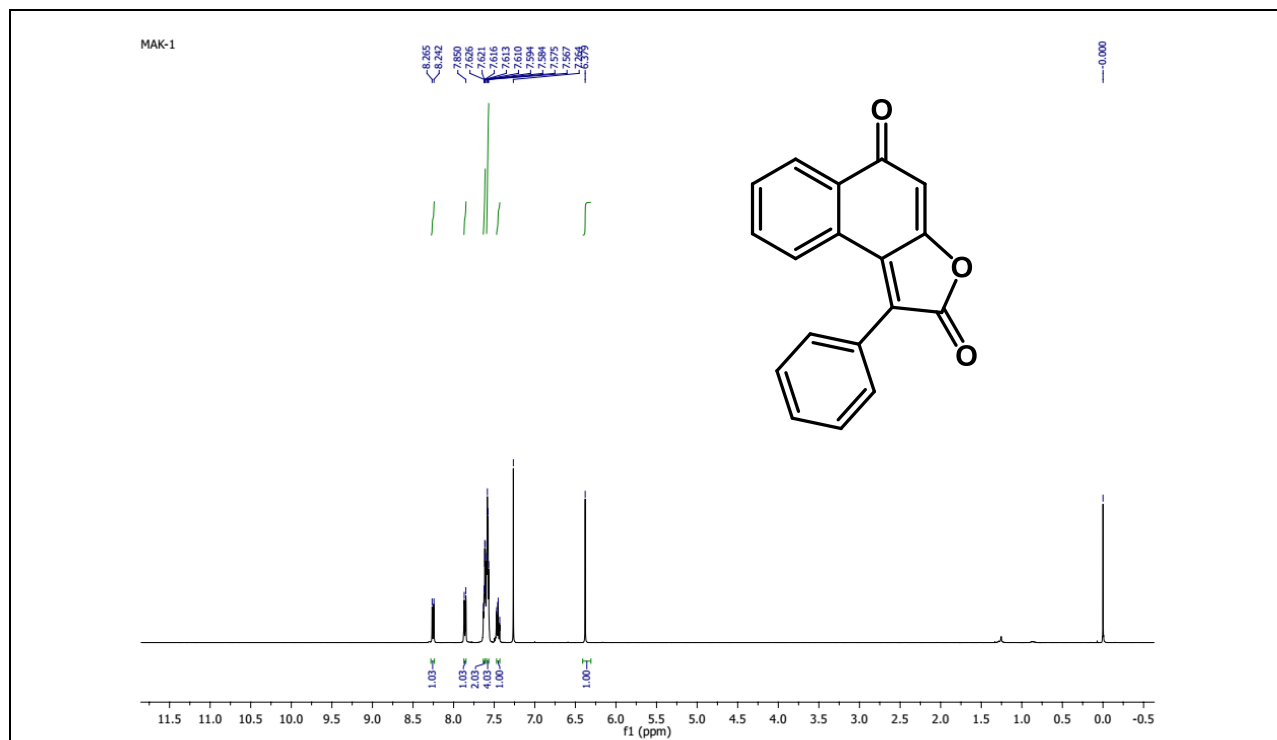

**Fig. 1.**  $^1\text{H}$ -NMR spectrum of 1-phenylnaphtho[2,1-*b*]furan-2,5-dione (table 2, **4a**).

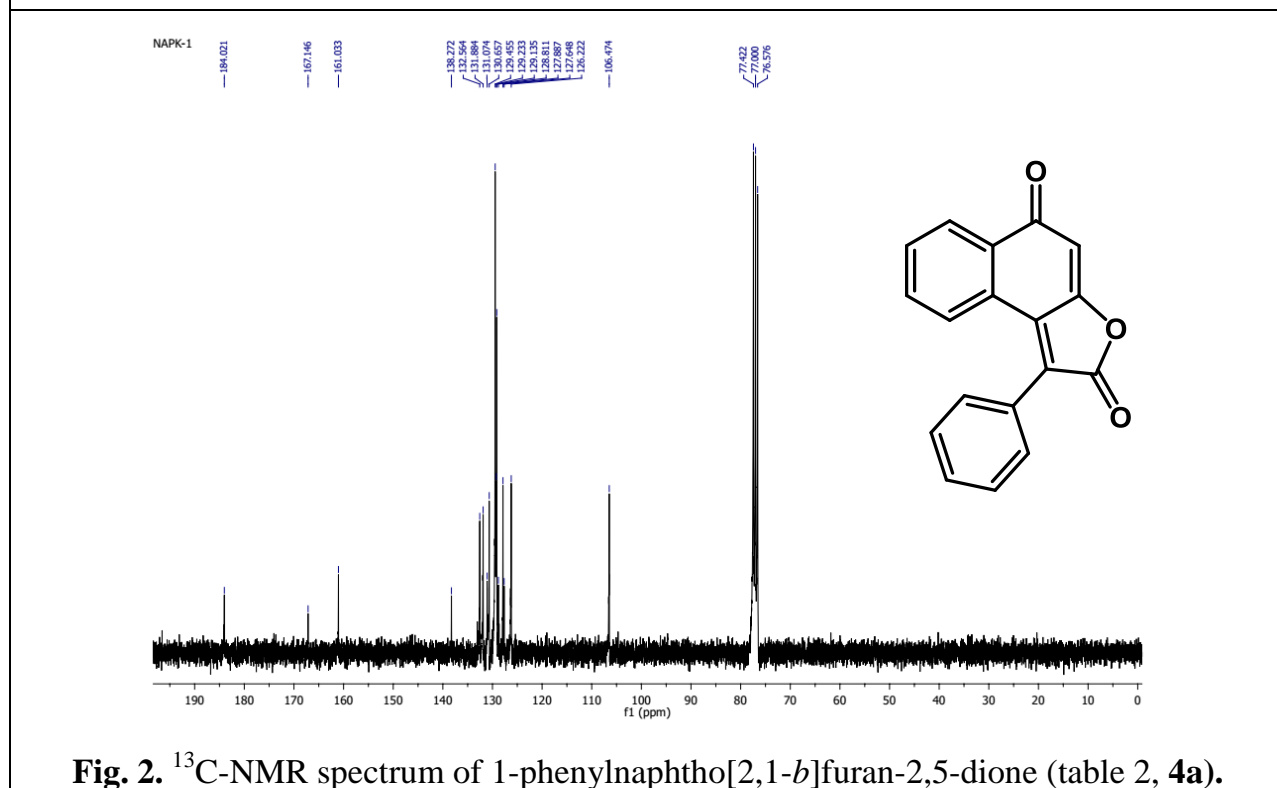

**Fig. 2.**  $^{13}\text{C}$ -NMR spectrum of 1-phenylnaphtho[2,1-*b*]furan-2,5-dione (table 2, **4a**).

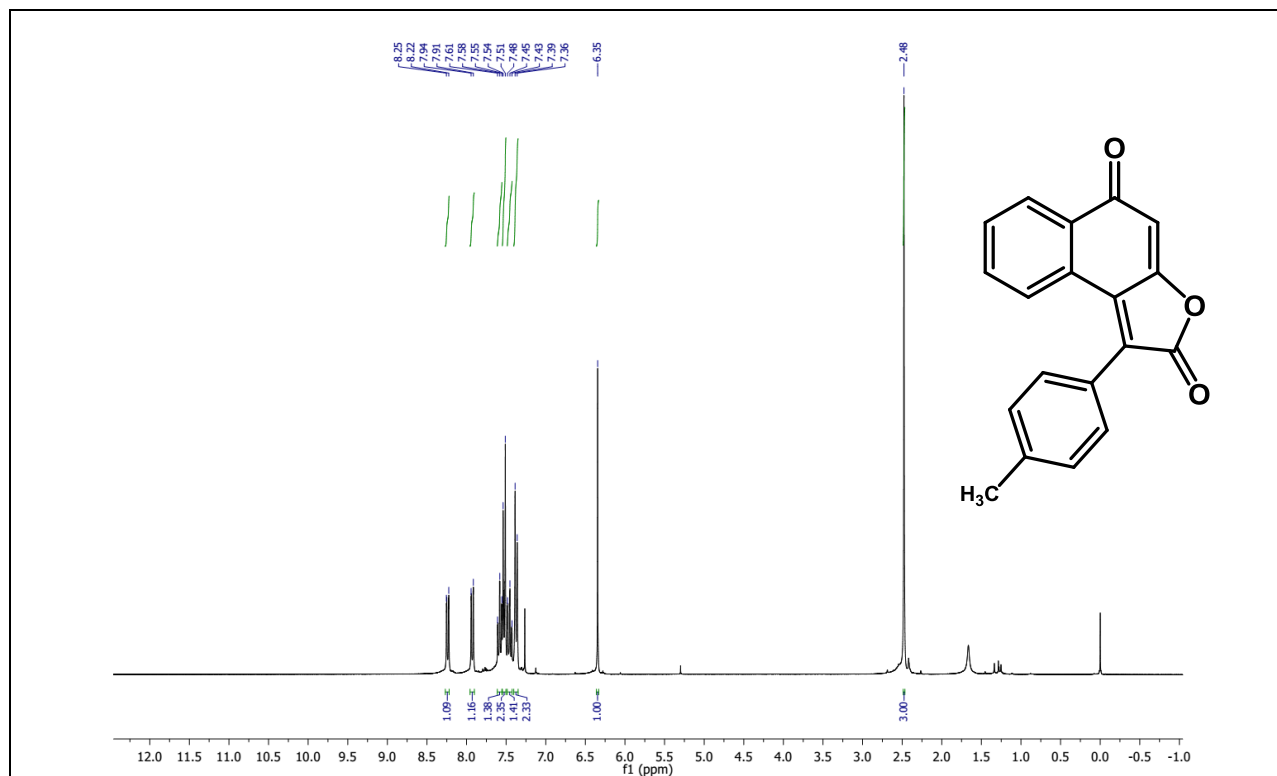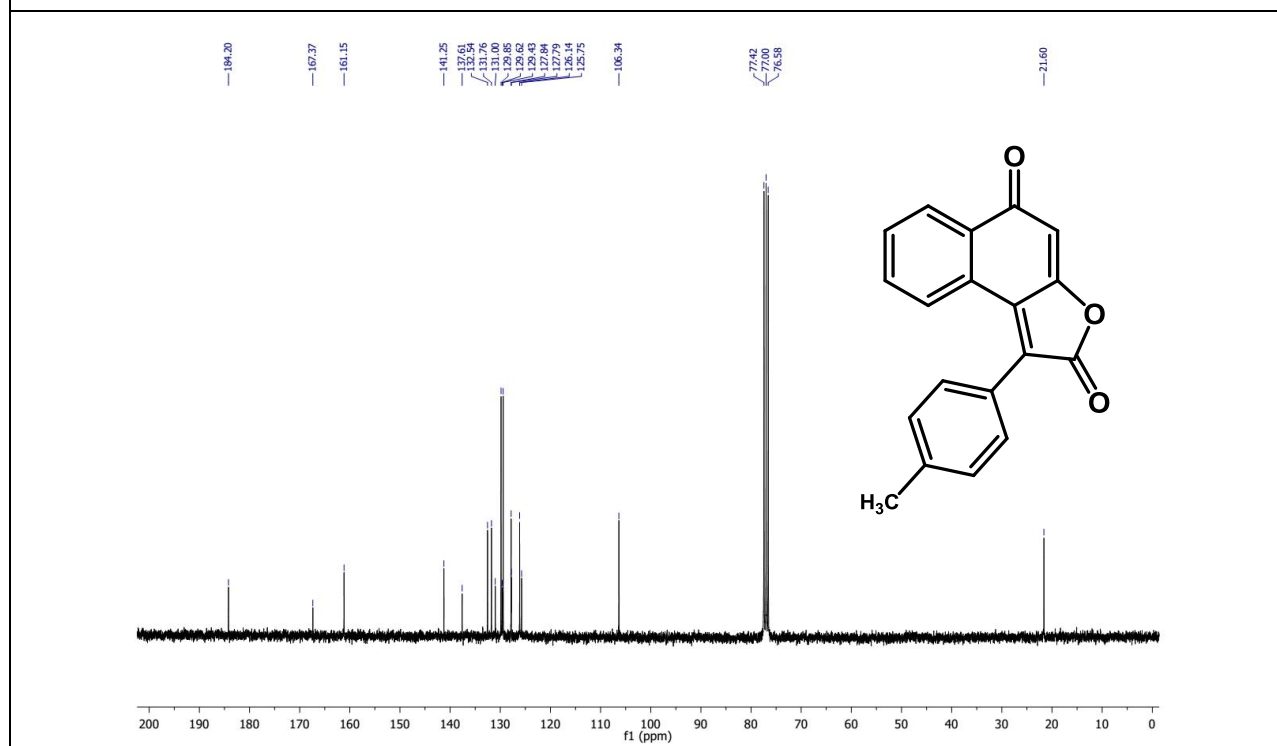

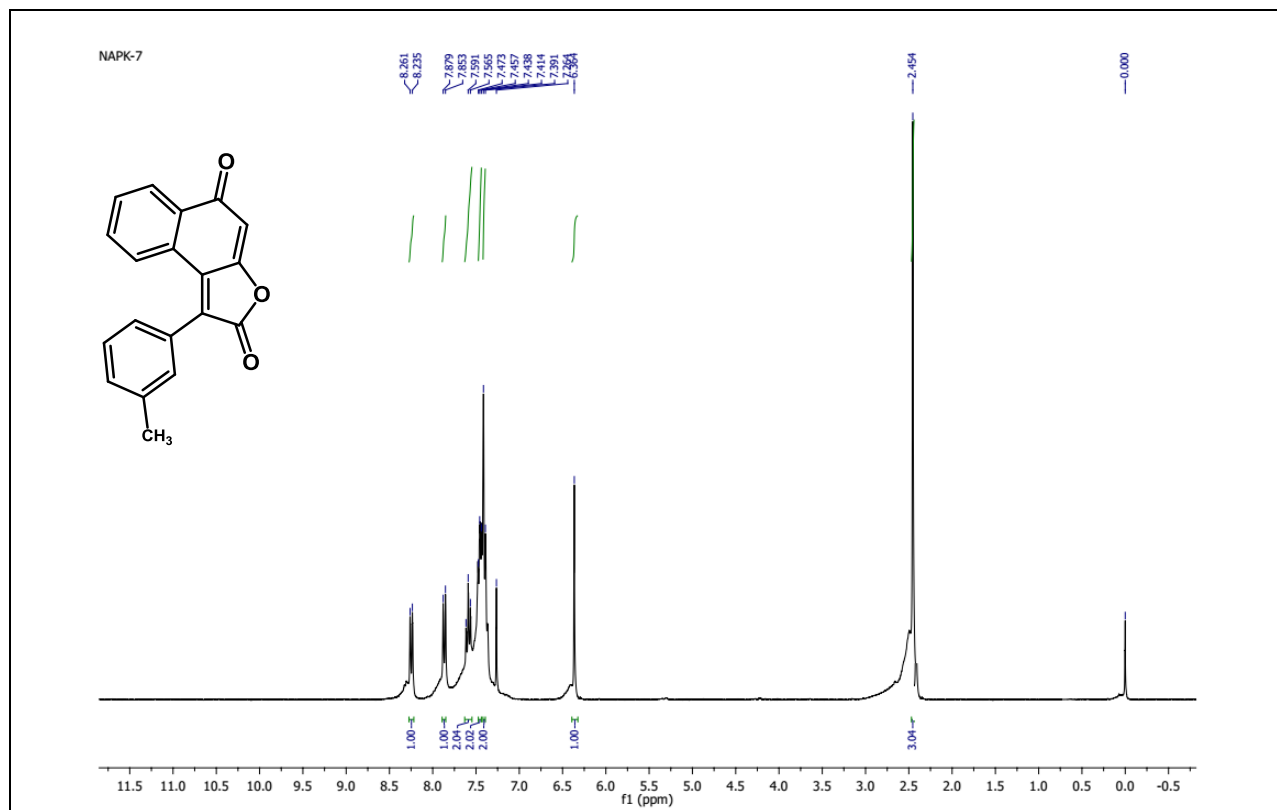

**Fig. 5.**  $^1\text{H-NMR}$  spectrum of 1-*m*-tolynaphtho[2,1-*b*]furan-2,5-dione (table 2, **4c**).

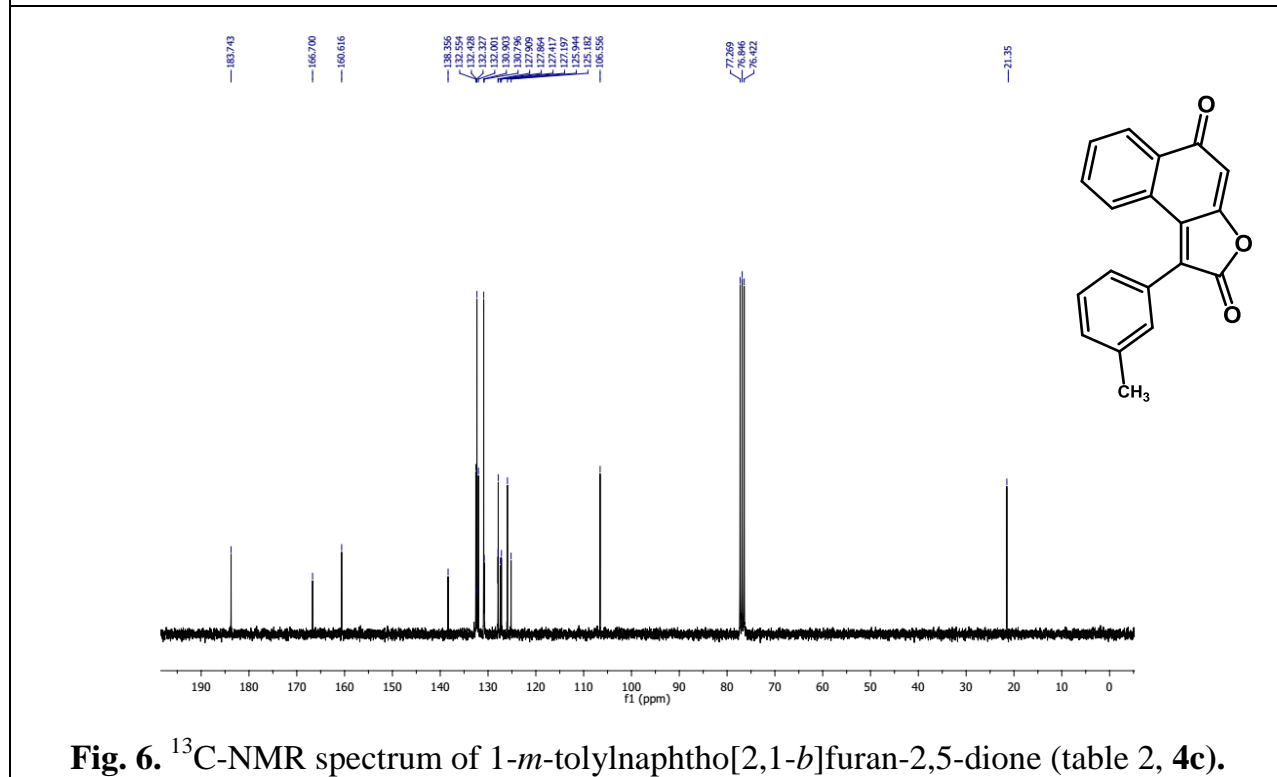

**Fig. 6.**  $^{13}\text{C-NMR}$  spectrum of 1-*m*-tolynaphtho[2,1-*b*]furan-2,5-dione (table 2, **4c**).

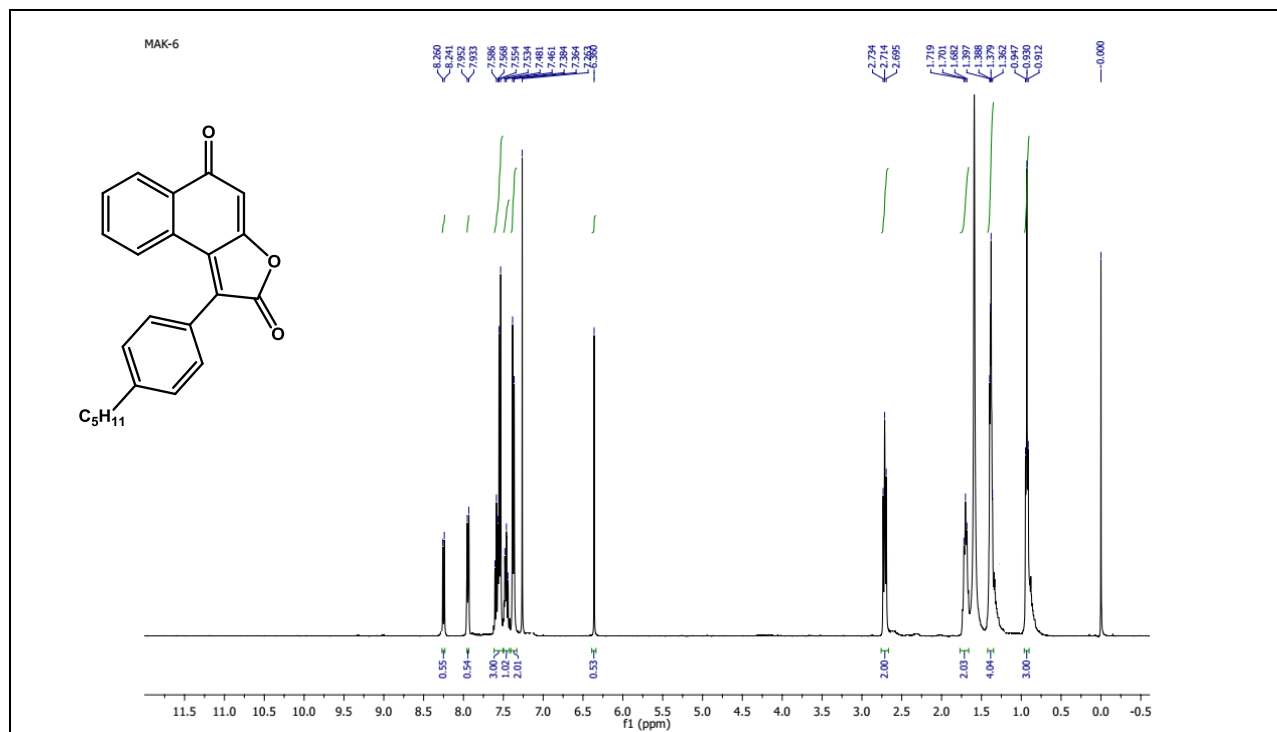

**Fig. 7.** <sup>1</sup>H-NMR spectrum of 1-(4-pentylphenyl)naphtho[2,1-*b*]furan-2,5-dione (table 2, 4d).

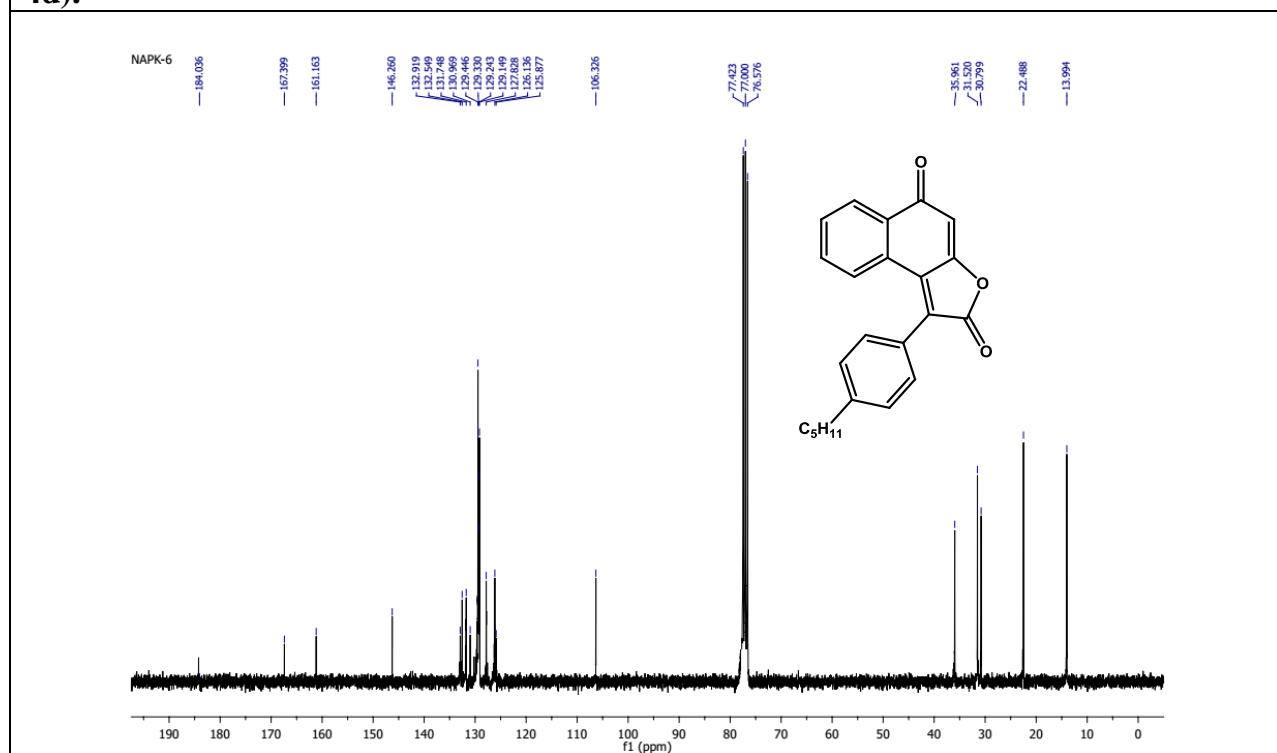

**Fig. 8.** <sup>13</sup>C-NMR spectrum of 1-(4-pentylphenyl)naphtho[2,1-*b*]furan-2,5-dione (table 2, 4d).

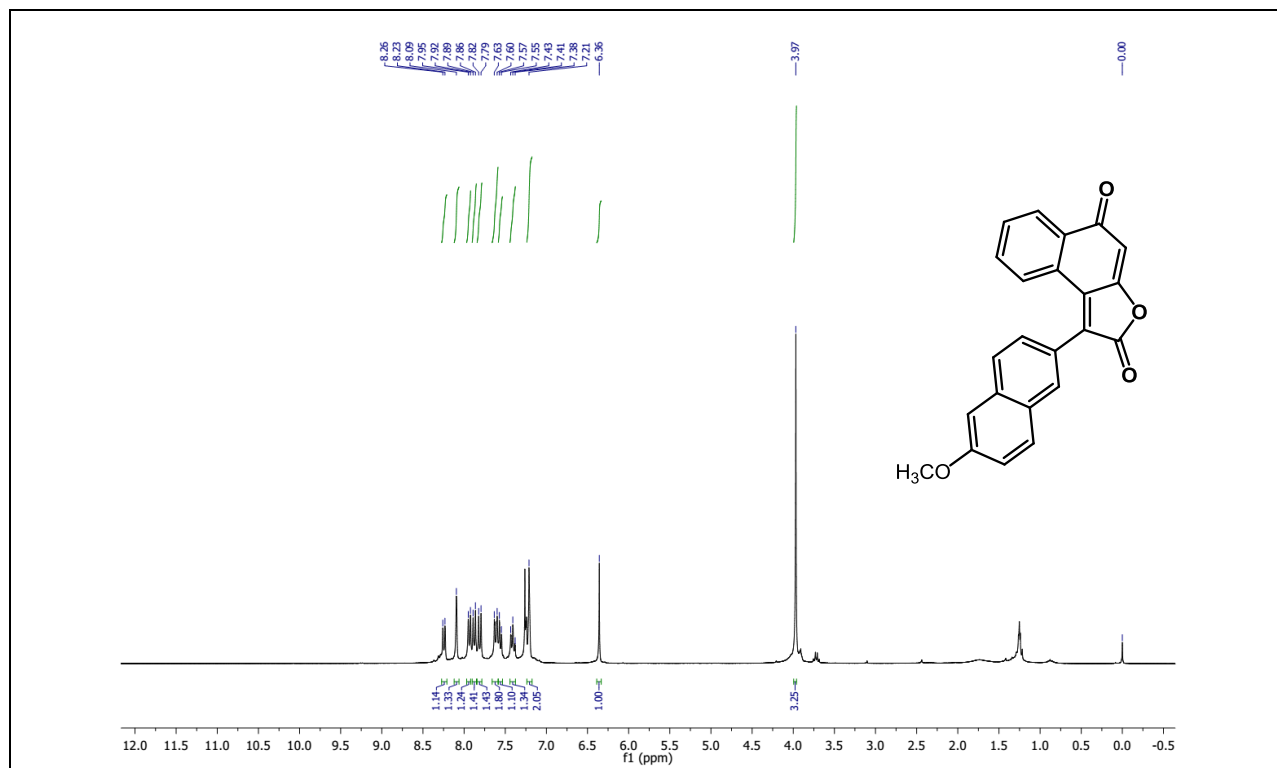

**Fig. 9.** <sup>1</sup>H-NMR spectrum of 1-(6-methoxynaphthalen-2-yl)naphtho[2,1-*b*]furan-2,5-dione (table 2, **4e**).

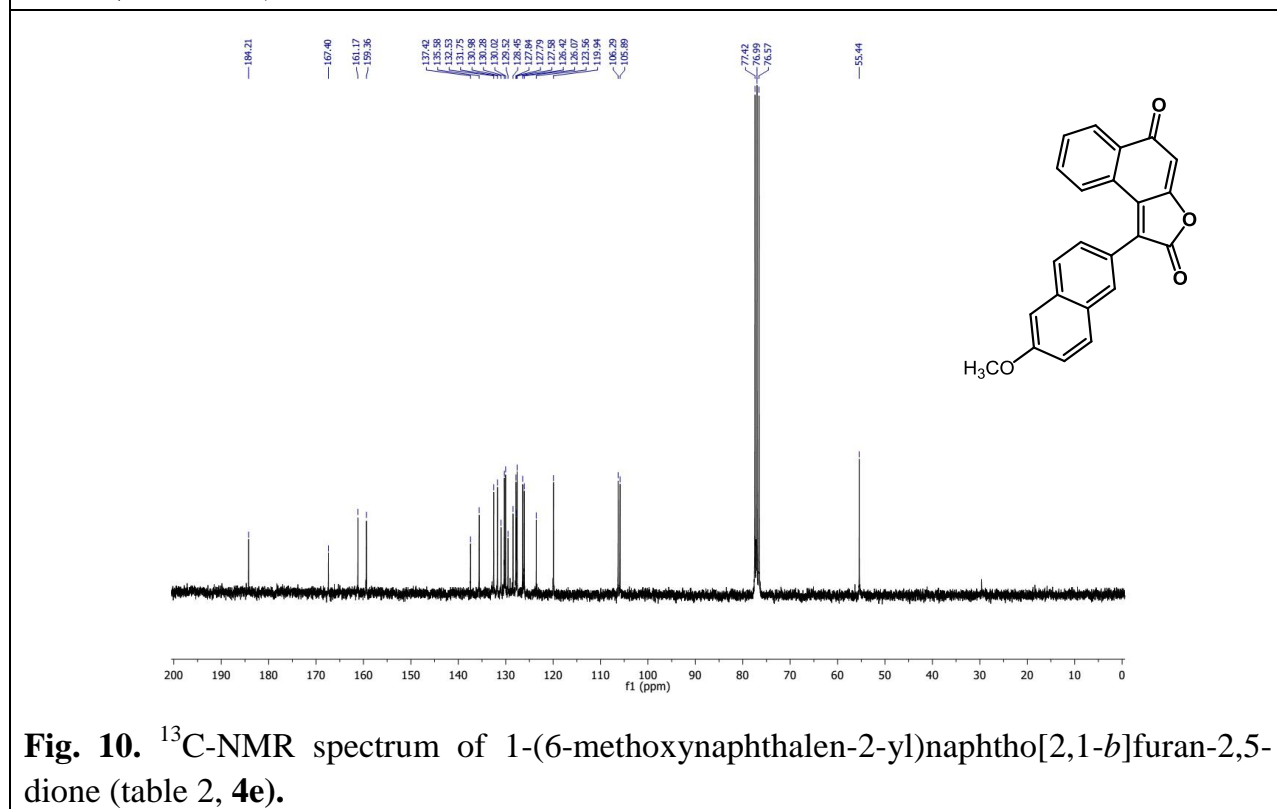

**Fig. 10.** <sup>13</sup>C-NMR spectrum of 1-(6-methoxynaphthalen-2-yl)naphtho[2,1-*b*]furan-2,5-dione (table 2, **4e**).

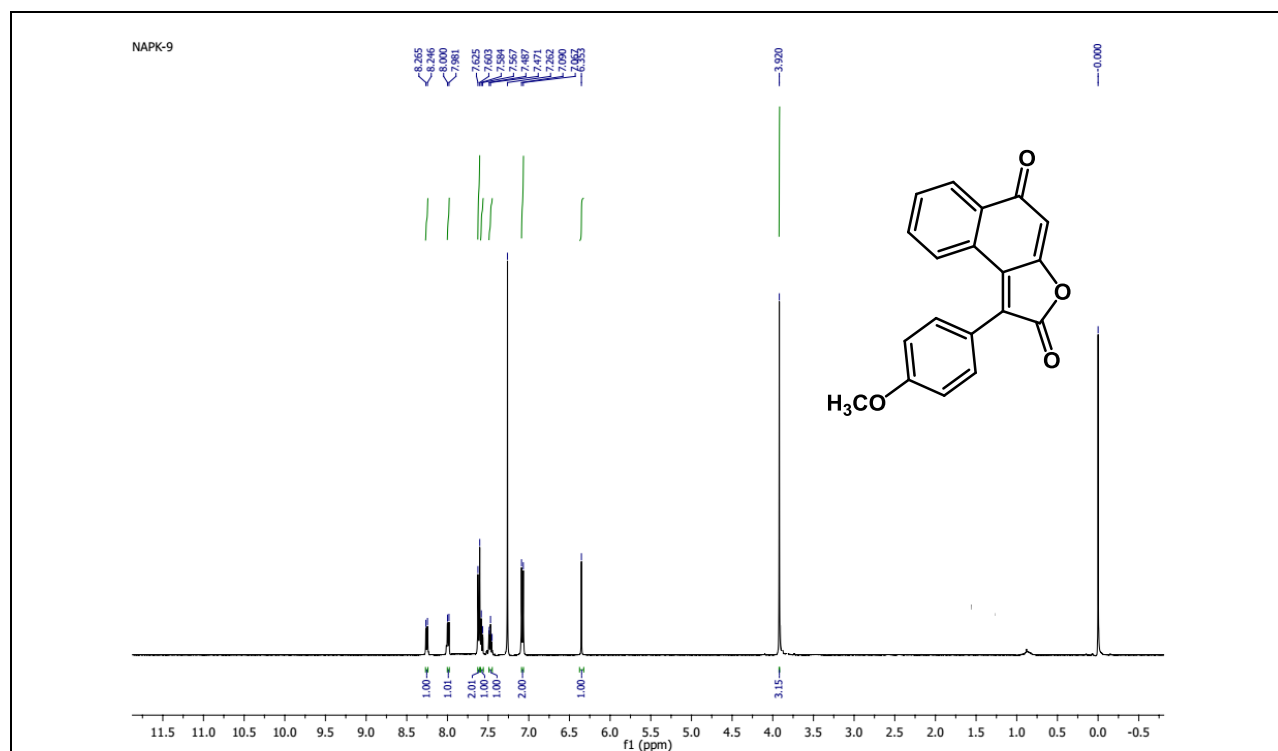

**Fig. 11.** <sup>1</sup>H-NMR spectrum of 1-(4-methoxyphenyl)naphtho[2,1-*b*]furan-2,5-dione (table 2, 4f).

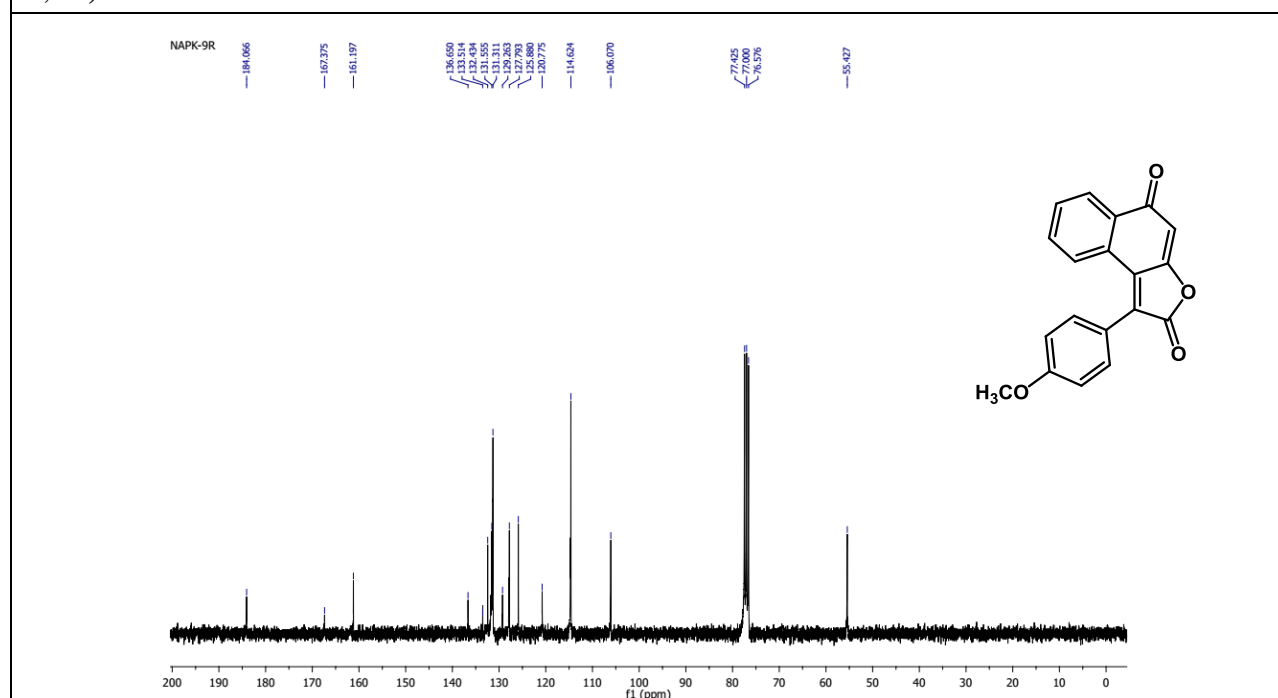

**Fig. 12.** <sup>13</sup>C-NMR spectrum of 1-(4-methoxyphenyl)naphtho[2,1-*b*]furan-2,5-dione (table 2, 4f).

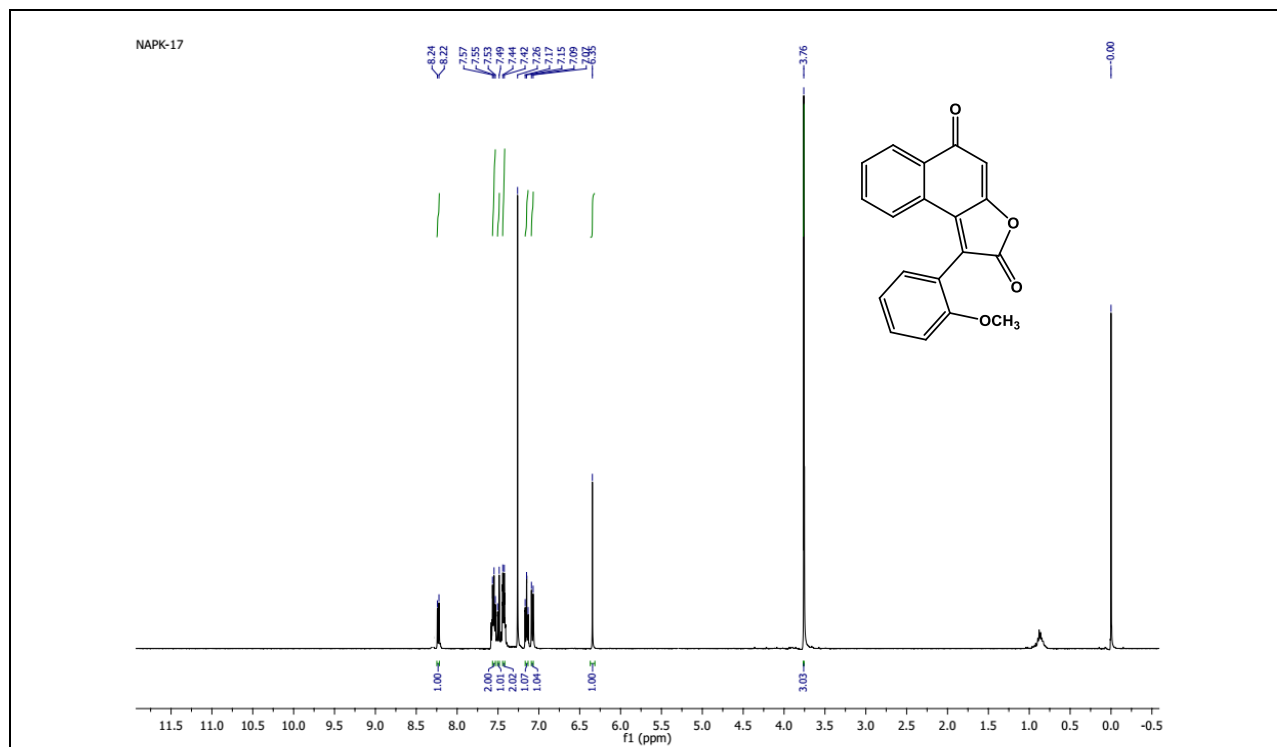

**Fig. 13.** <sup>1</sup>H-NMR spectrum of 1-(2-methoxyphenyl)naphtho[2,1-*b*]furan-2,5-dione (table 2, **4g**).

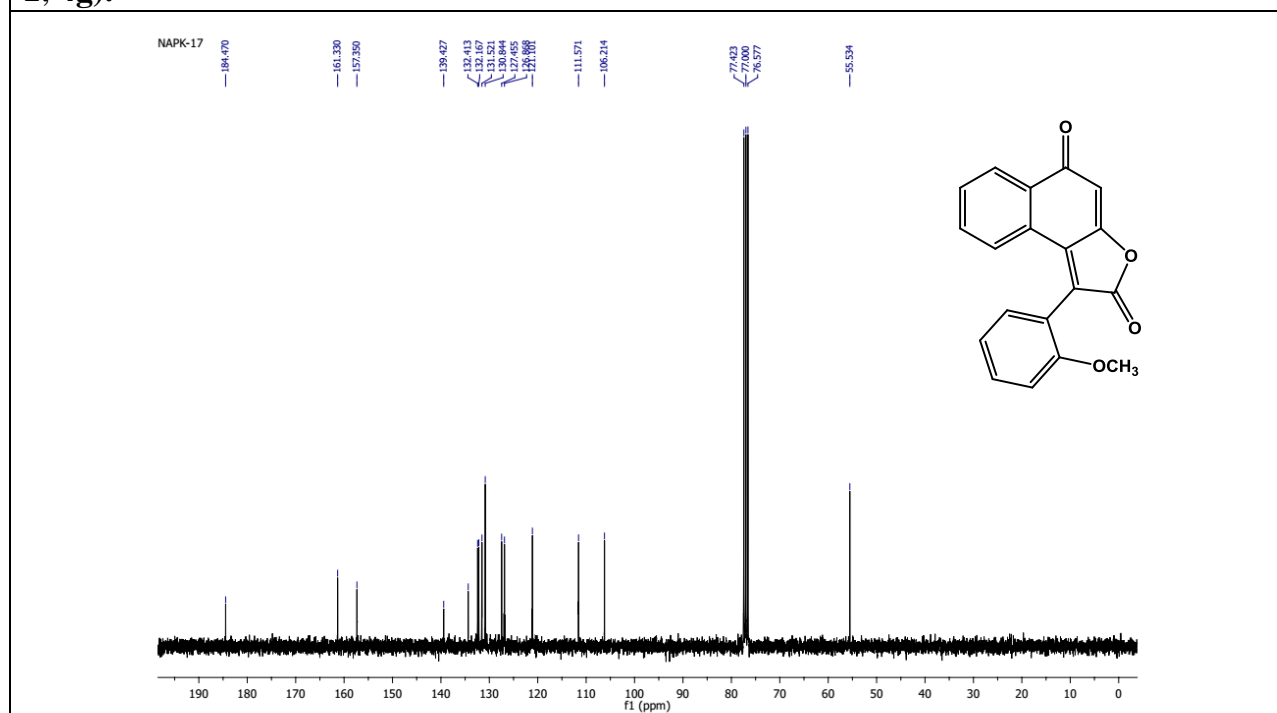

**Fig. 14.** <sup>13</sup>C-NMR spectrum of 1-(2-methoxyphenyl)naphtho[2,1-*b*]furan-2,5-dione (table 2, **4g**).



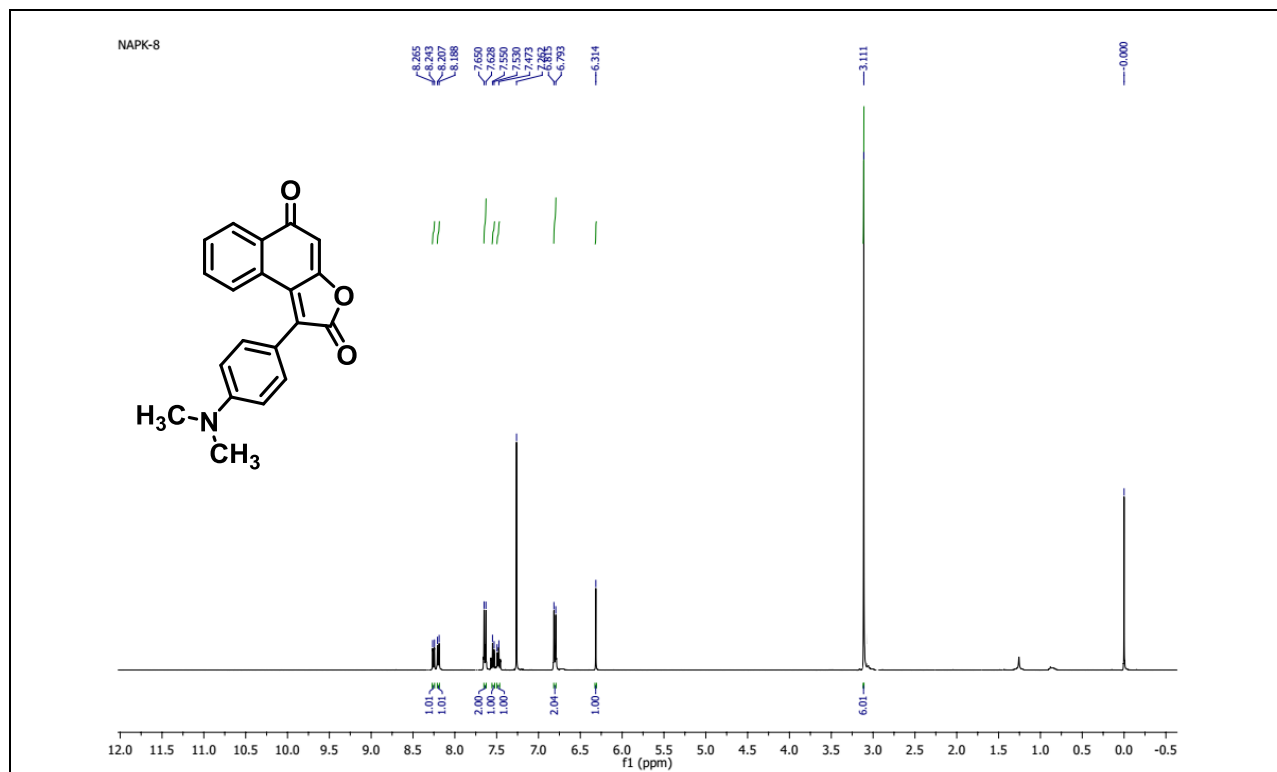

**Fig. 15.** <sup>1</sup>H-NMR spectrum of 1-(4-(dimethylamino)phenyl)naphtho[2,1-*b*]furan-2,5-dione (table 2, **4h**).

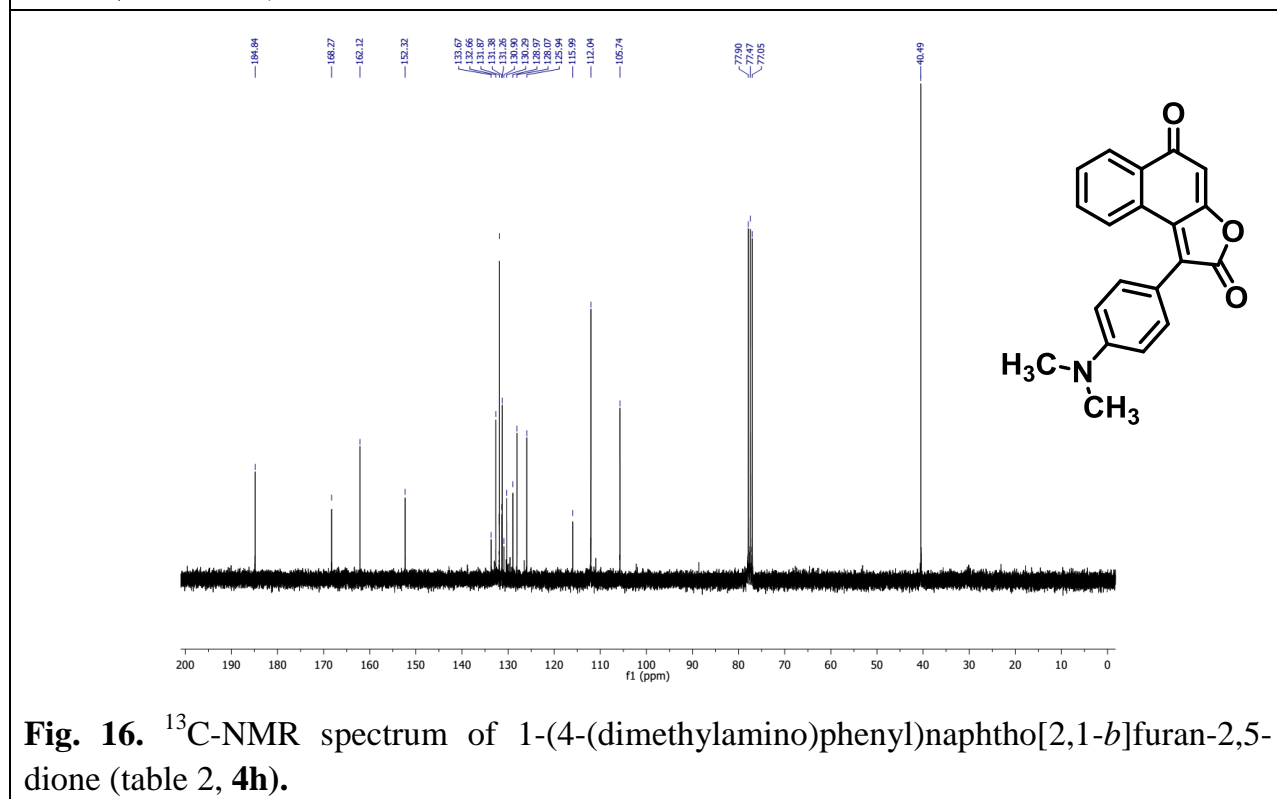

**Fig. 16.** <sup>13</sup>C-NMR spectrum of 1-(4-(dimethylamino)phenyl)naphtho[2,1-*b*]furan-2,5-dione (table 2, **4h**).

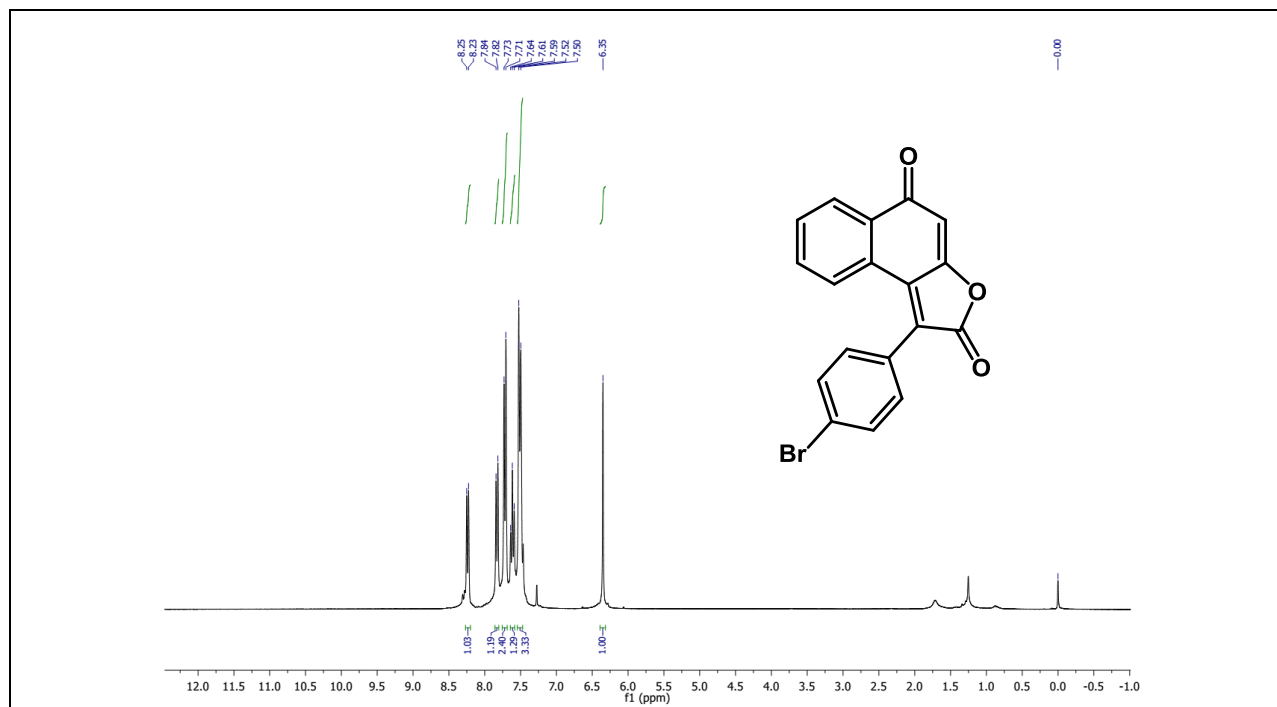

**Fig. 17.** <sup>1</sup>H-NMR spectrum of 1-(4-bromophenyl)naphtho[2,1-*b*]furan-2,5-dione (table 2, 4i).

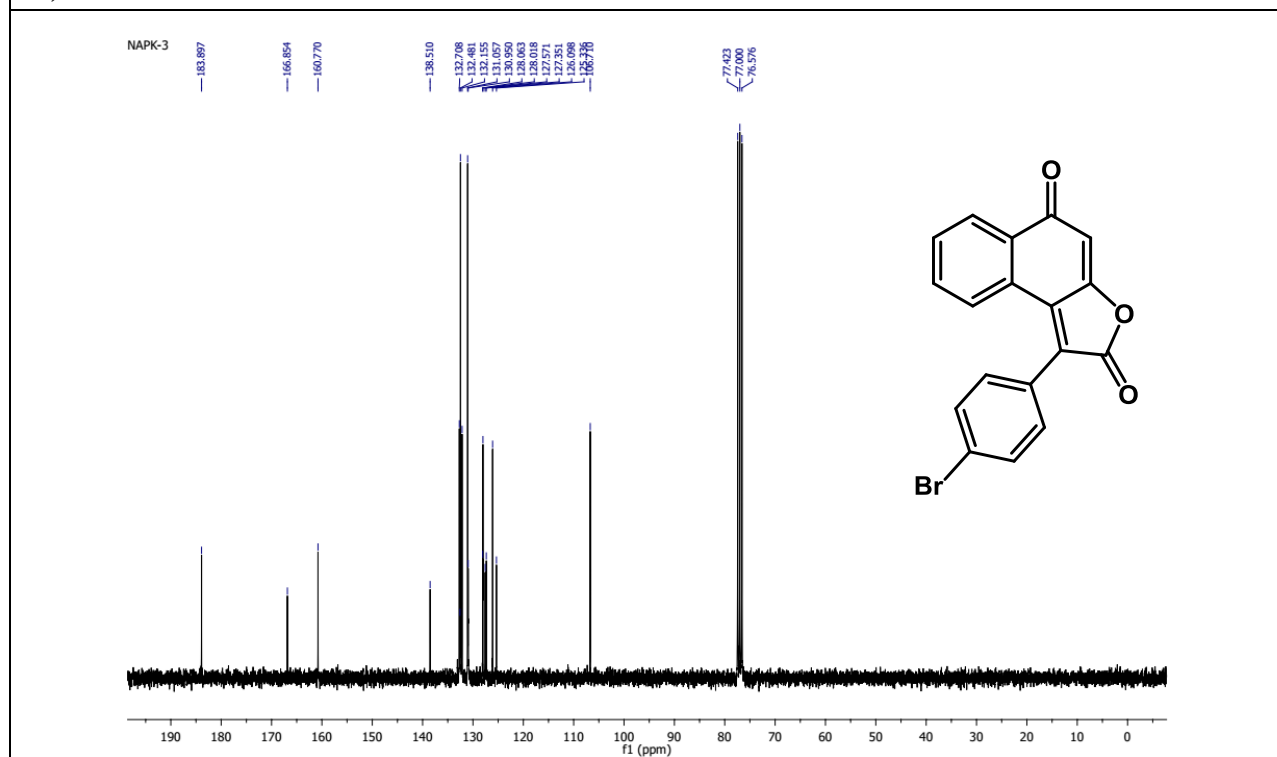

**Fig. 18.** <sup>13</sup>C-NMR spectrum of 1-(4-bromophenyl)naphtho[2,1-*b*]furan-2,5-dione (table 2, 4i).

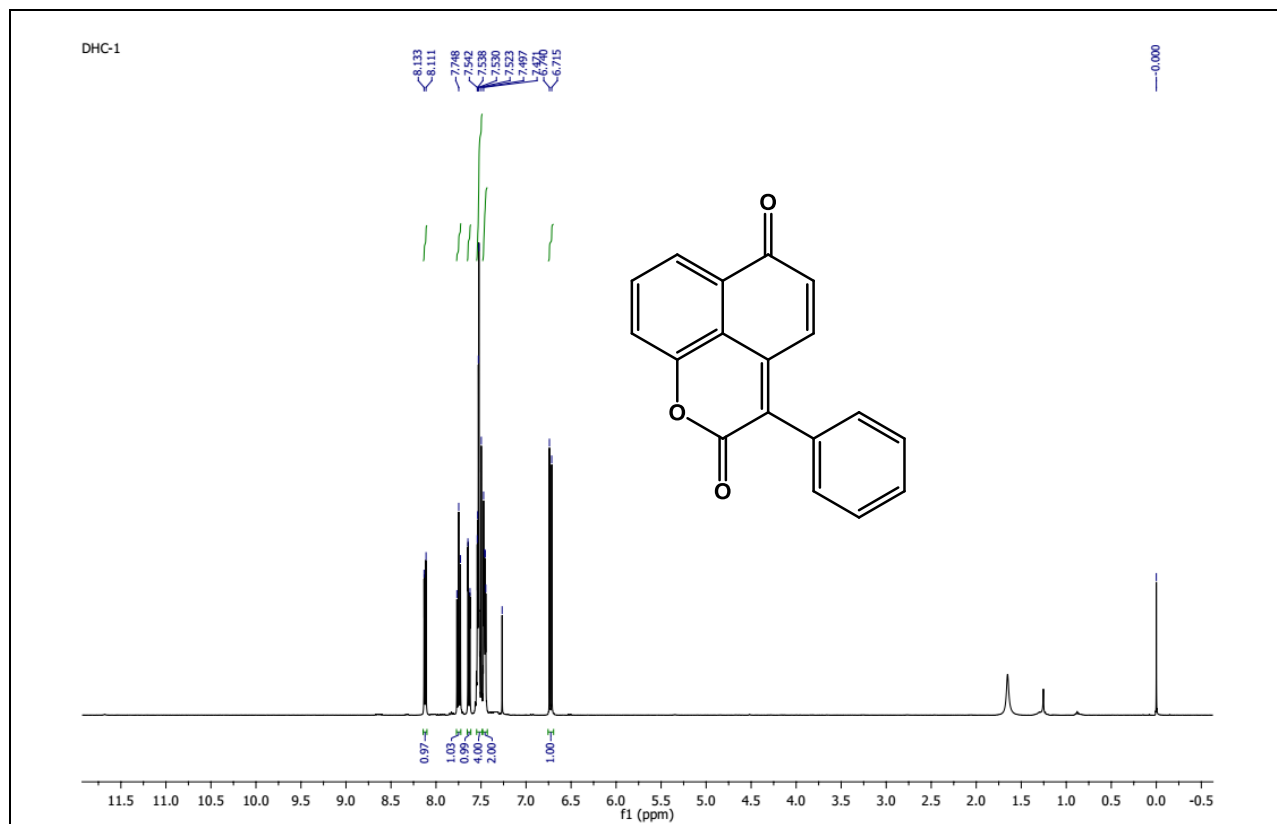

**Fig. 19.**  $^1\text{H}$ -NMR spectrum of 3-phenylbenzo[*de*]chromene-2,6-dione (table 4, 7a).

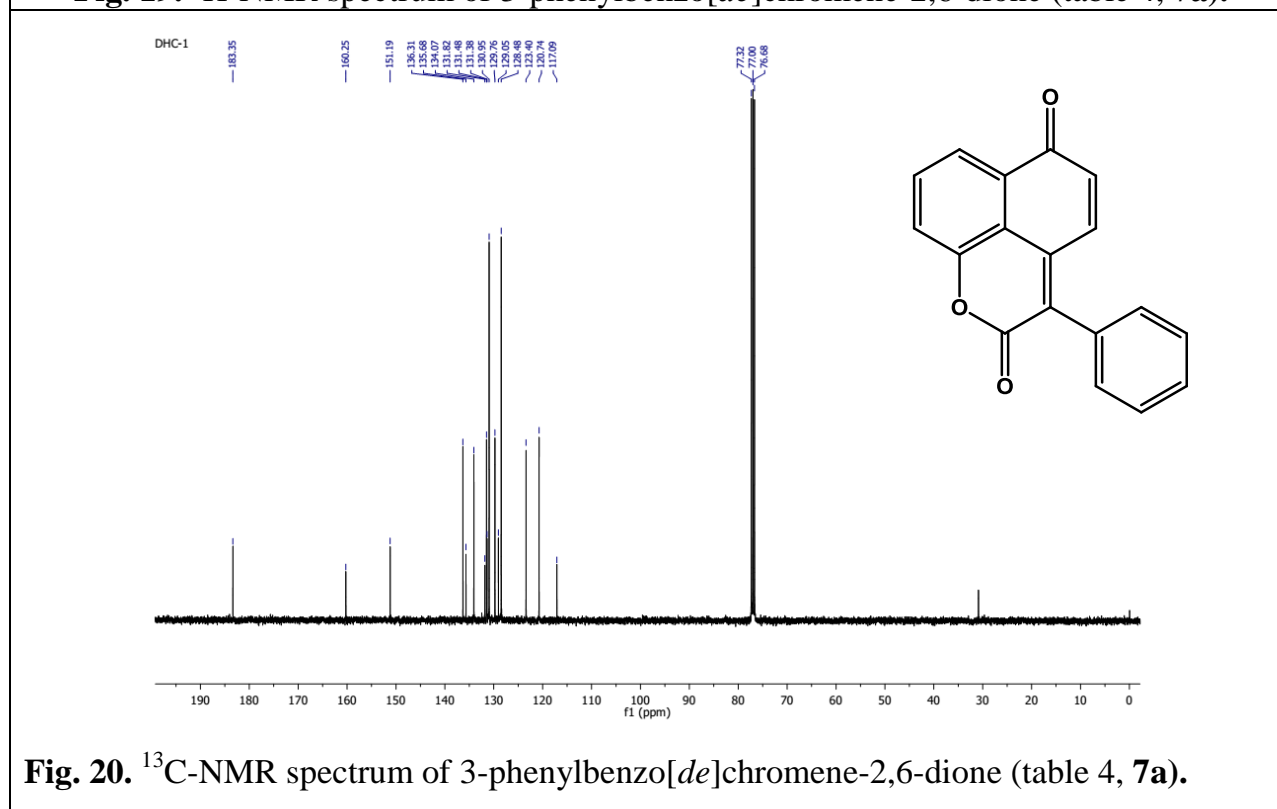

**Fig. 20.**  $^{13}\text{C}$ -NMR spectrum of 3-phenylbenzo[*de*]chromene-2,6-dione (table 4, 7a).

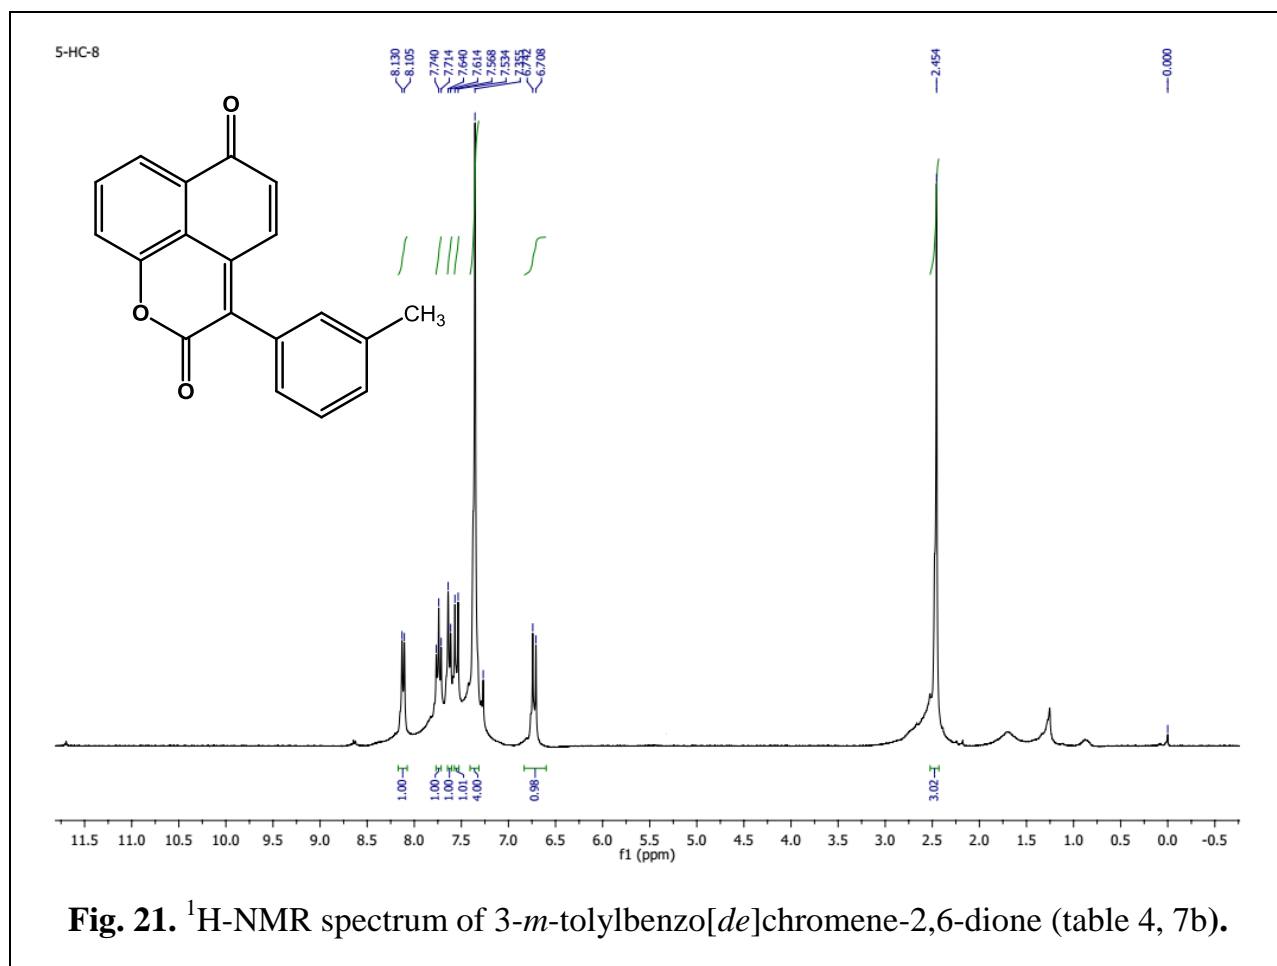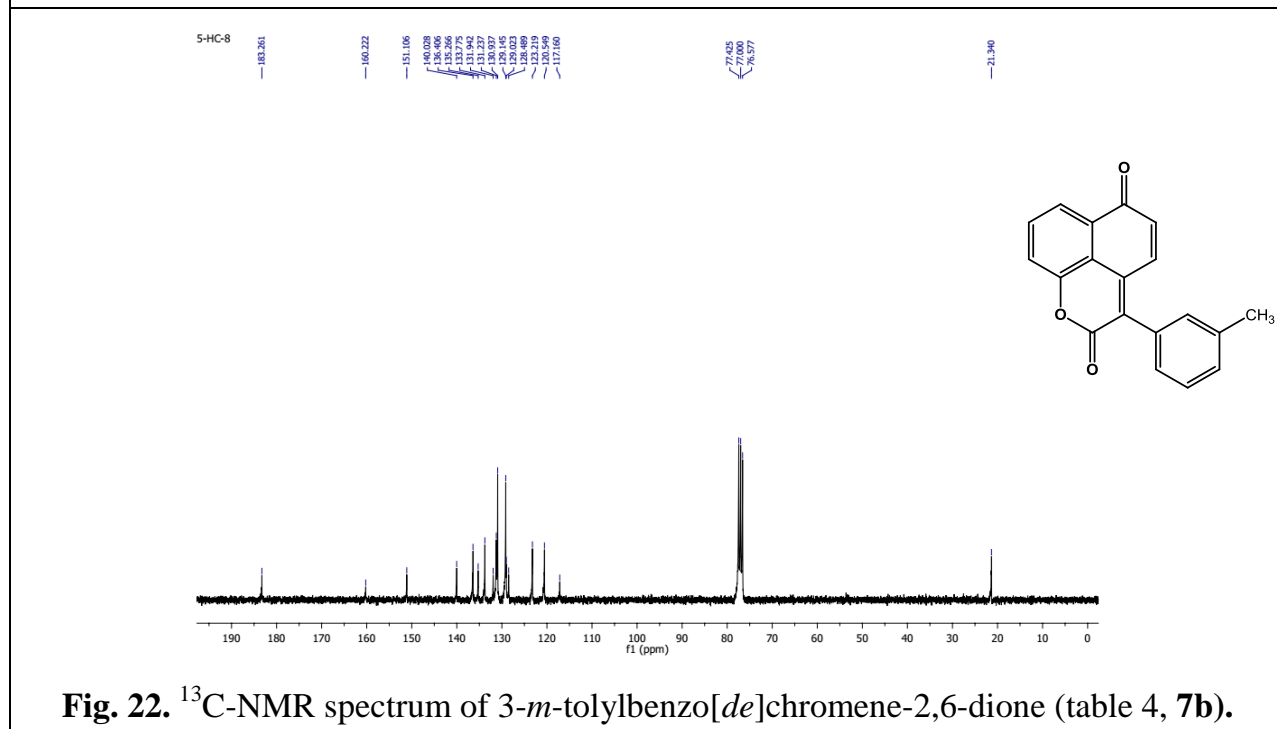

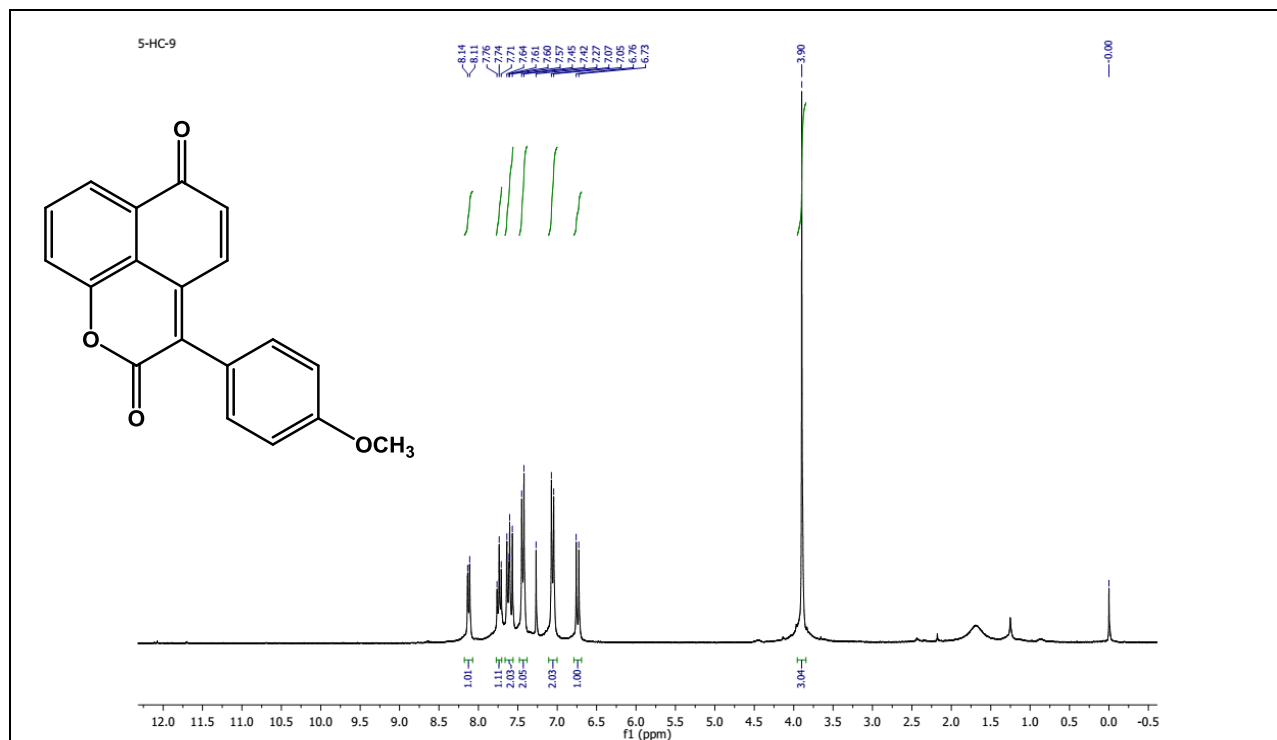

**Fig. 23.**  $^1\text{H-NMR}$  spectrum of 3-(4-methoxyphenyl)benzo[de]chromene-2,6-dione (table 4, 7c).

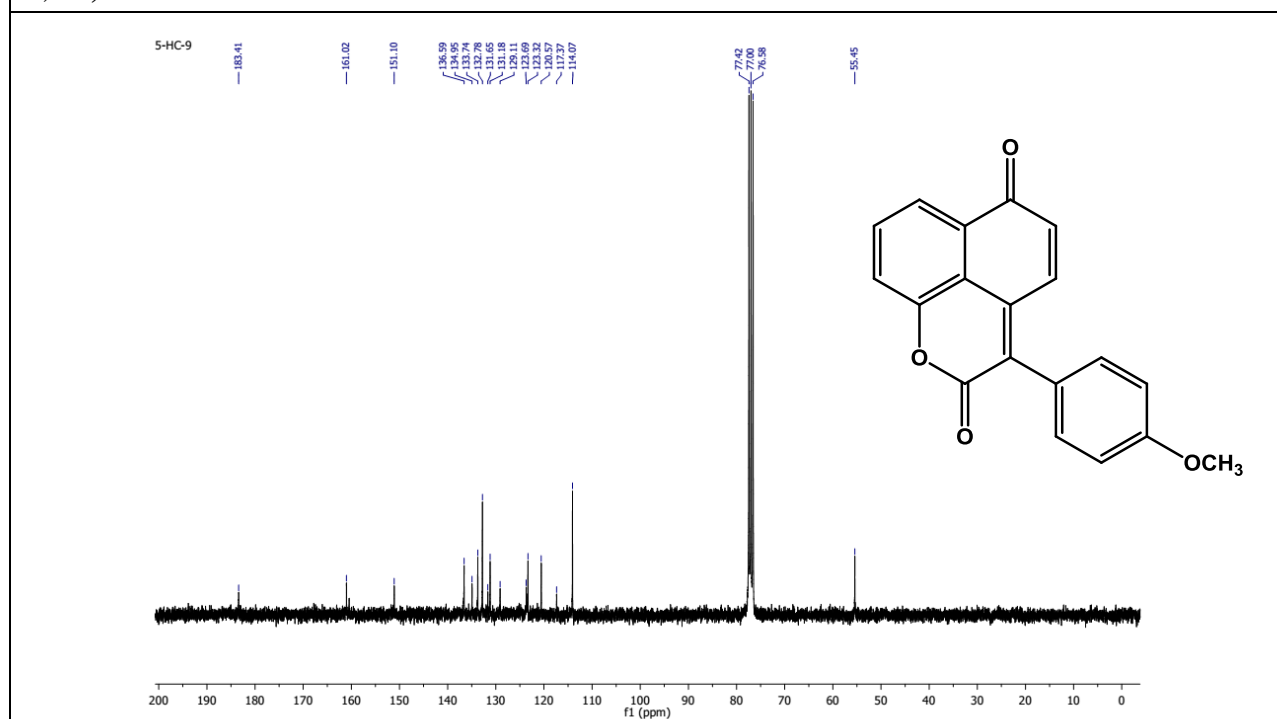

**Fig. 24.**  $^{13}\text{C-NMR}$  spectrum of 3-(4-methoxyphenyl)benzo[de]chromene-2,6-dione (table 4, 7c).

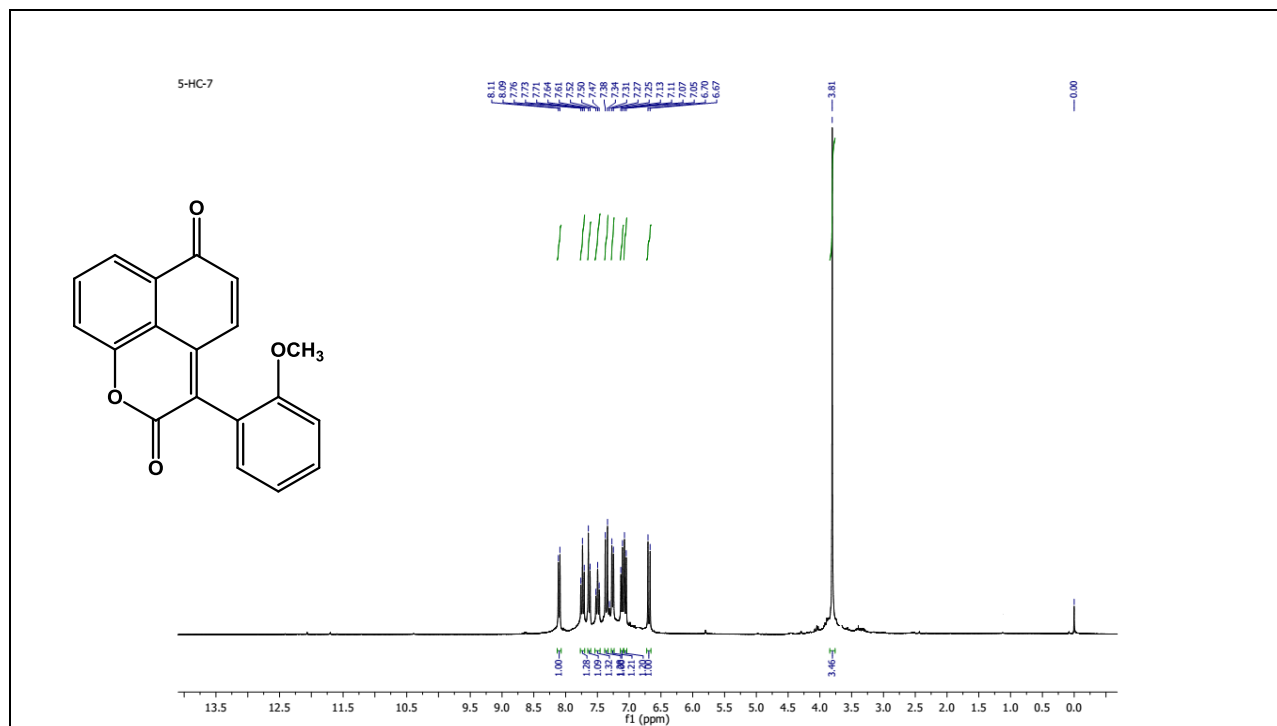

**Fig. 25.** <sup>1</sup>H-NMR spectrum of 3-(2-methoxyphenyl)benzo[*de*]chromene-2,6-dione (table 4, 7d).

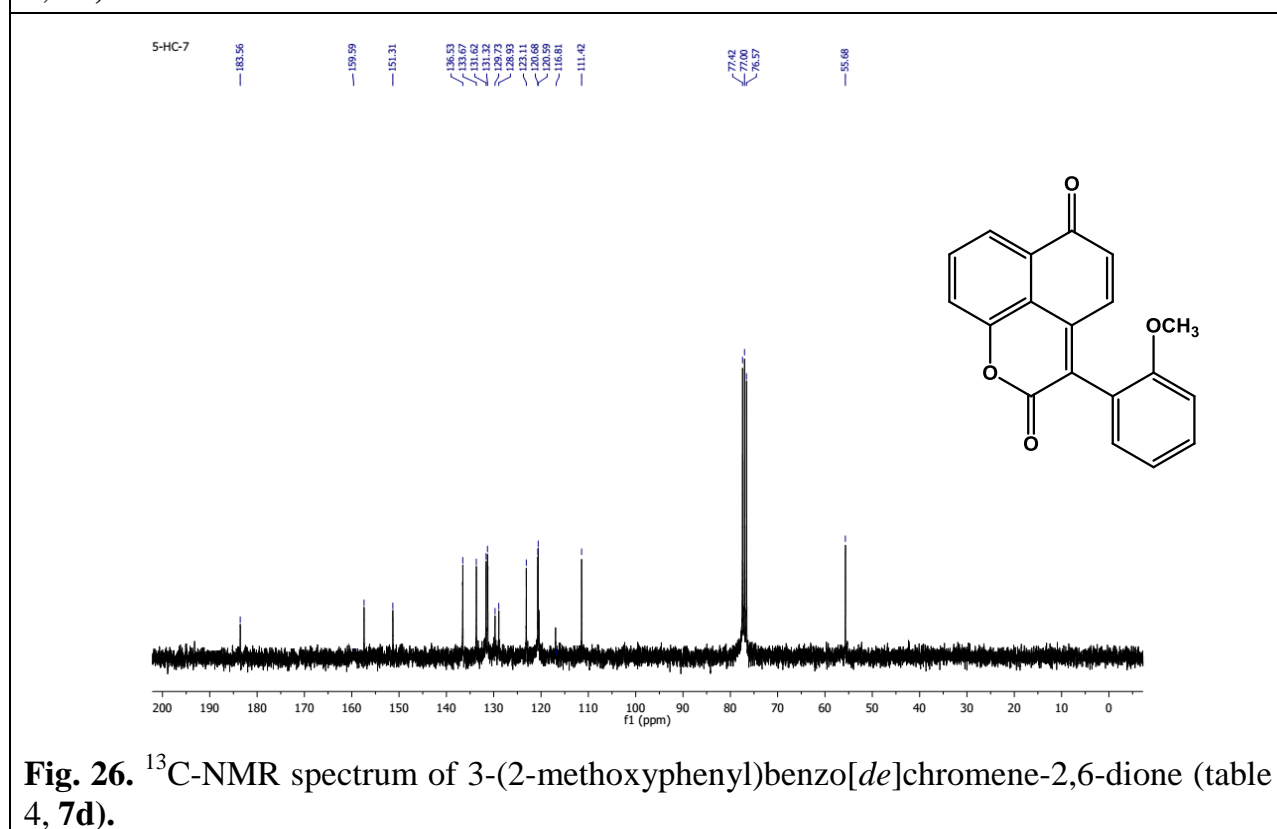

**Fig. 26.** <sup>13</sup>C-NMR spectrum of 3-(2-methoxyphenyl)benzo[*de*]chromene-2,6-dione (table 4, 7d).

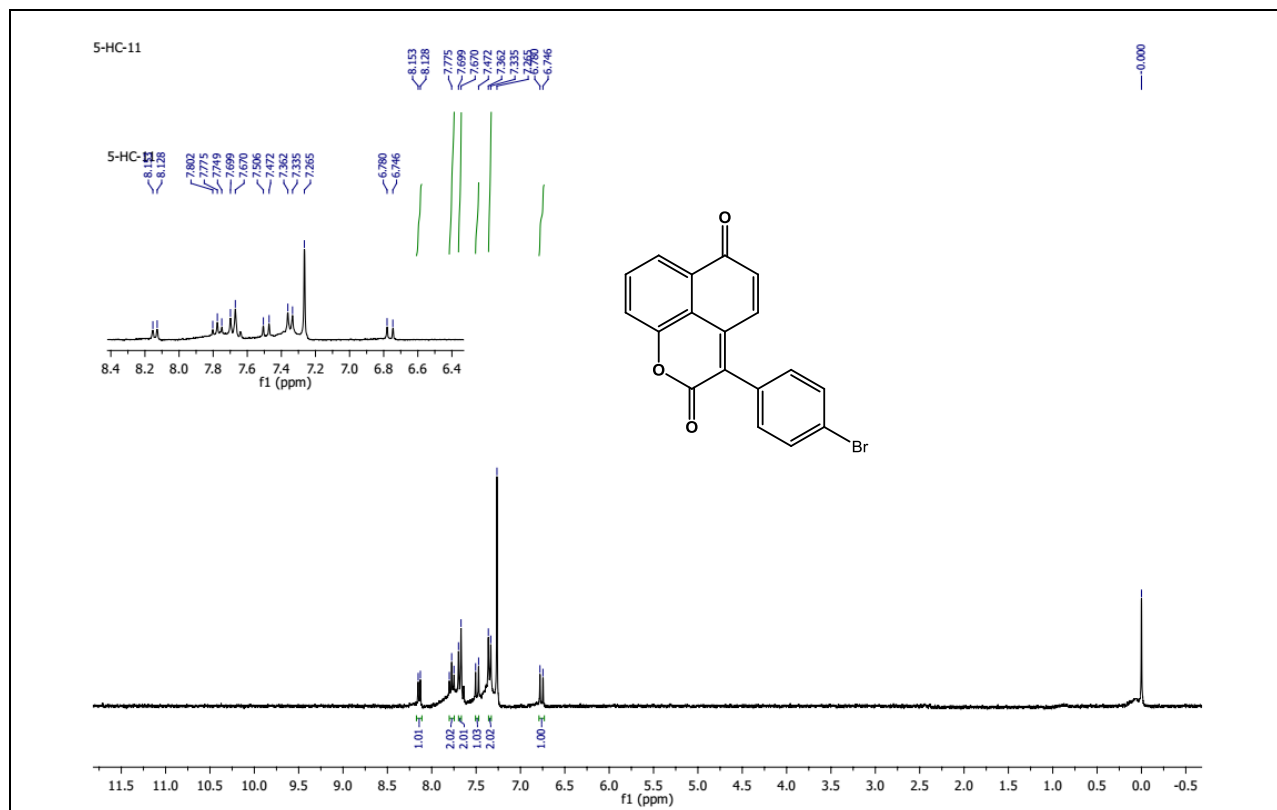

**Fig. 27.**  $^1\text{H-NMR}$  spectrum of 3-(4-bromophenyl)benzo[*de*]chromene-2,6-dione (table 4, 7e).

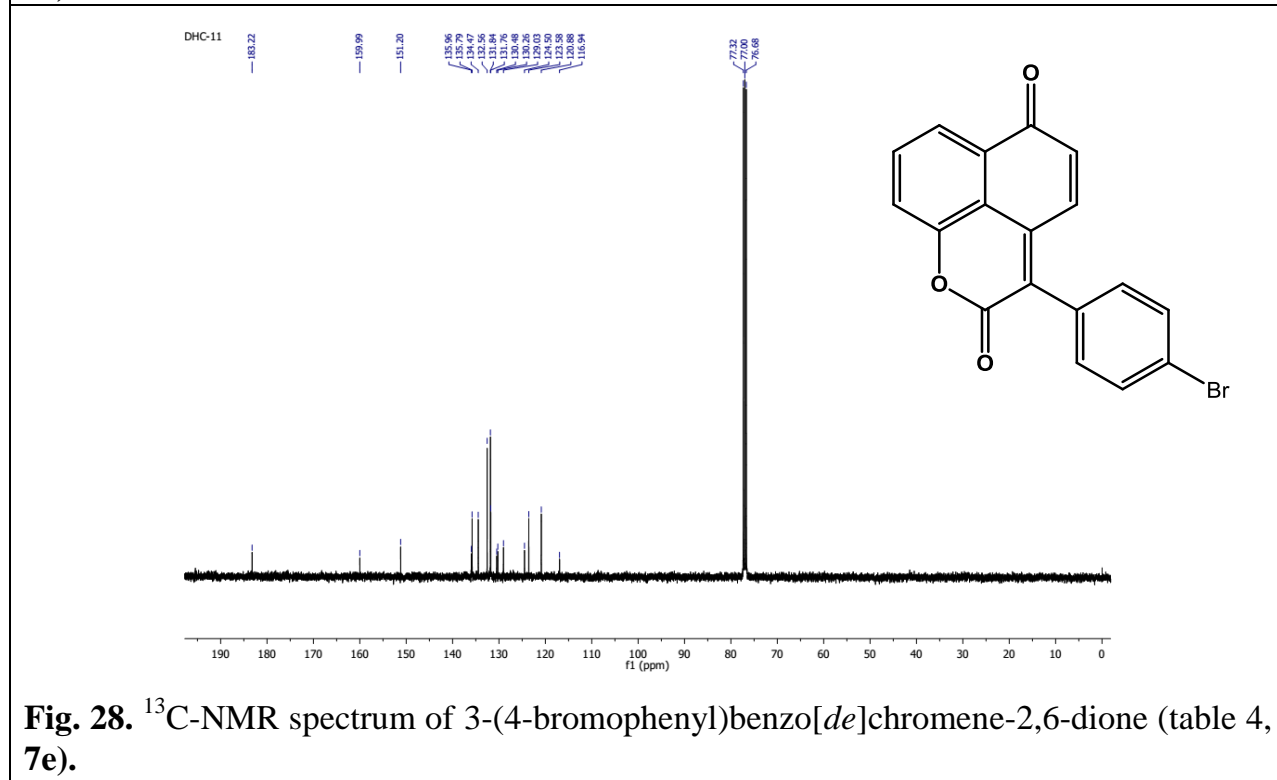

**Fig. 28.**  $^{13}\text{C-NMR}$  spectrum of 3-(4-bromophenyl)benzo[*de*]chromene-2,6-dione (table 4, 7e).

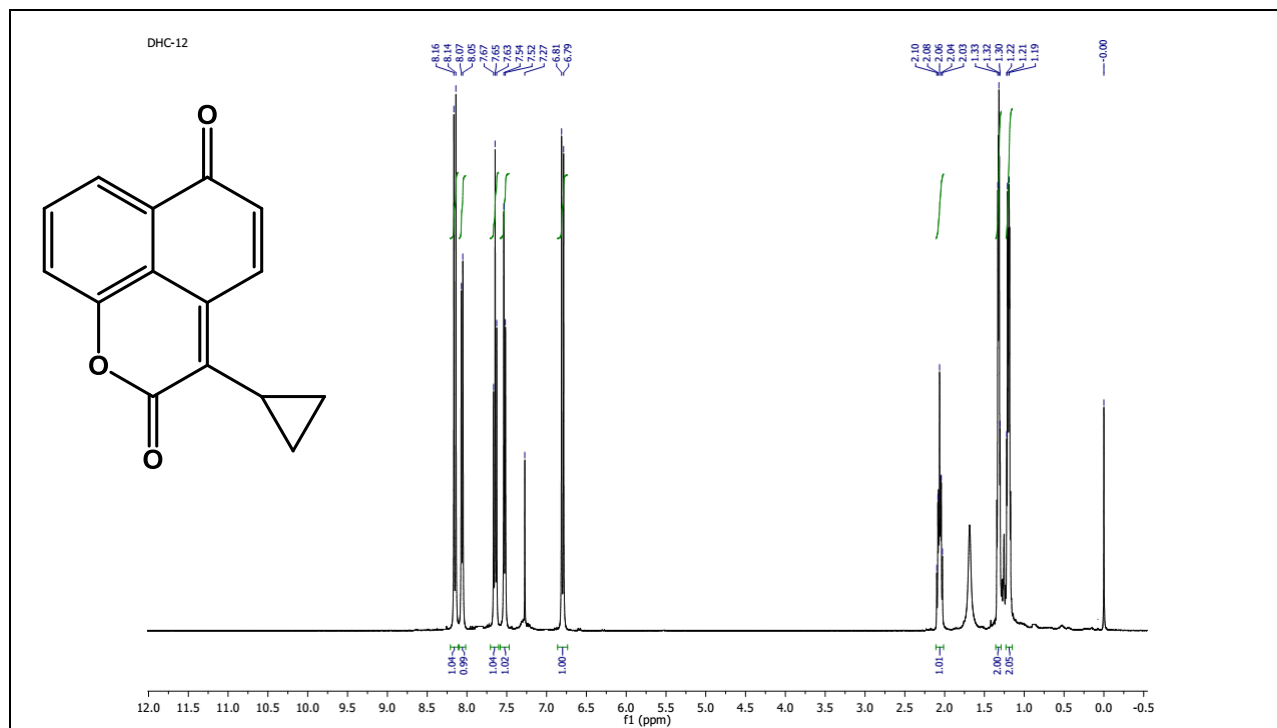

**Fig. 29.**  $^1\text{H}$ -NMR spectrum of 3-cyclopropylbenzo[*de*]chromene-2,6-dione (table 4, **7g**).

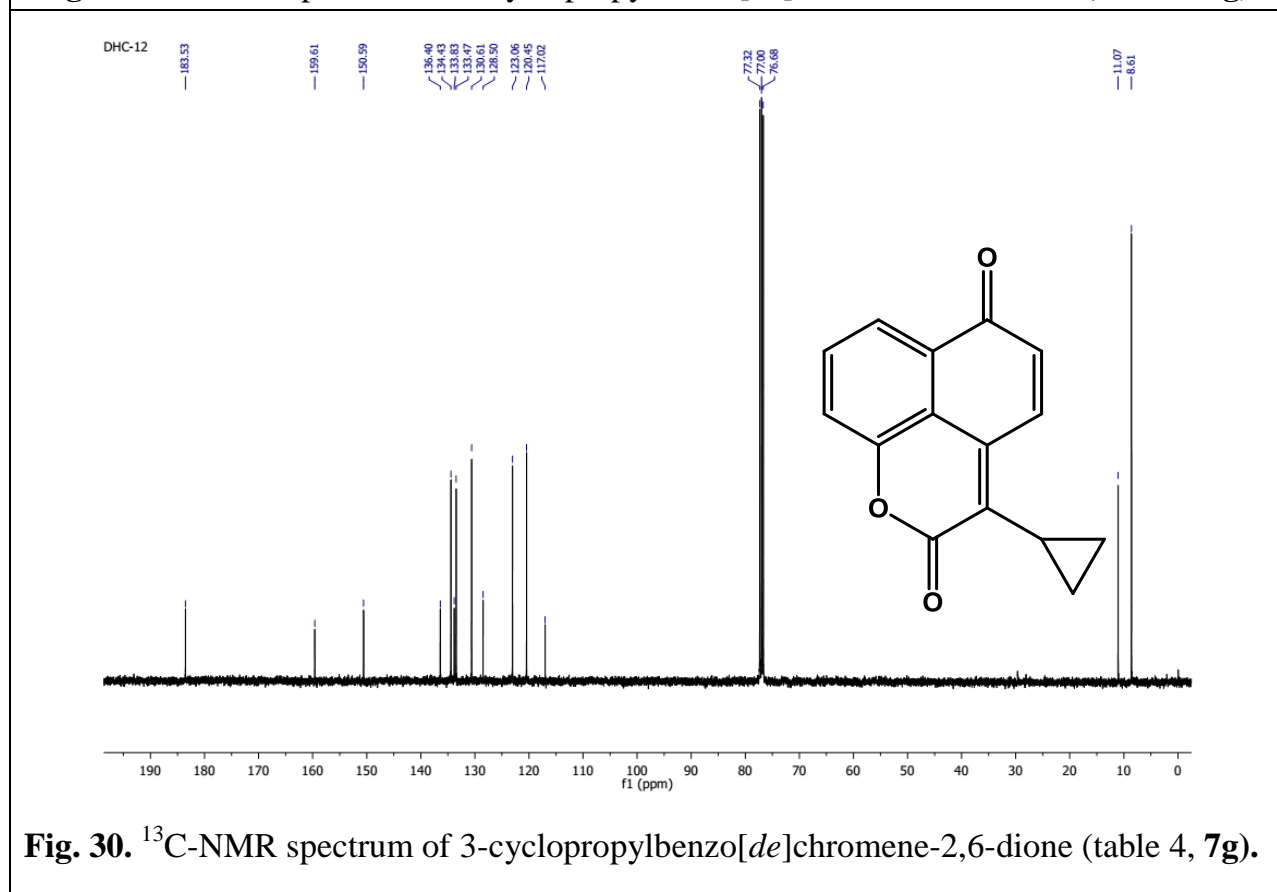

**Fig. 30.**  $^{13}\text{C}$ -NMR spectrum of 3-cyclopropylbenzo[*de*]chromene-2,6-dione (table 4, **7g**).



## References

1. a) R. A. Abramovitch, T. Chellathurai, D. W. Holcomb, T. I. McMaster, D. P. Vanderpool, *J. Org. Chem.* **1977**, *42*, 2920; b) R. L. Danheiser, R. F. Miller, R. G. Brisbois, S. Z. Park, *J. Org. Chem.* **1990**, *55*, 1959.
2. a) G. Choudhary, R. Krishna Peddinti, *Green Chem.*, **2011**, *13*, 3290; b) A. Z.-Halimehjani, M. R. Saidi, *Tetrahedron Lett.* **2008**, *49*, 1244.
3. Z. Li, K. Xie, R. C. T. Slade, *Appl. Catal. A: Gen.* **2001**, *209*, 107.
4. S. Denizot, R. Lange, *J. Immunol. Methods*, **1986**, *89*, 271.
